# Supplementary material for: Immune-mediated hookworm clearance and survival of a marine mammal decrease with warmer ocean temperatures
Source: eLife. 2018 Nov 6;7:e38432. doi: 10.7554/eLife.38432 (PMC6245726; doi:10.7554/eLife.38432)
Supplement: Figure 1—source data 1. [file elife-38432-fig1-data1.xlsx]

## Sheet: Sheet1
Sex	year	Growth rate	Hookworm Burden	Infectious Period	mortality	Hemoglobin	Cholesterol	BUN	Albumin	Globulins	Creatinine	Triglycerides	Glucose	IgG	Neut	Lymph	Mon	Eos	Baso
Female	2017	53.1	2	15	0	11.25	5.5	7.8	44	25	55	0.8	7.9	8.87666	7543.22	2916.51	456.05	805.6	220		Legends and units of measurement
Female	2017	73.9	5	21	0	13.275	5.5	8.9	51	37	96	6.2	9.6	12.4725	7651.18	4946.68	703.375	696.75	213.25
Male	2017	105.4	3	14	0	15.05	5.55	8.6	49	21.5	60	0.65	7.6	24.2275	5605.95	4645.46	823.2	651.575	142.162		Growth rate = grams per day
Male	2017	12	10	30	1	8.25	4.6	5.9	42	32	52	0.8	5.5	3.5		1642.02	472.4	385	0		Hookworm burden = number of eggs per fecal smear
Male	2017	17.5	157	32	0	7.875	4.05	14.65	42.5	73	61	0.9	8.75	30.5007	7414.61	4981.8	685.163	1087.88	81.675		Infectious Period = number of days sheeding hookworm eggs
Male	2017	81	1	12	0	13.75	4.5	11.2	44	27	57	2.7	10.7	12.134	8343.3	4501.88	613.725	995.975	237.5		Hemoglobin (gr/dL)
Female	2017	83.6	3	20	0	10.625	5.9	15.4	45	45	59	1.7	9	5.4903	7330.95	4891.25	907.75	1289.5	282.5		Cholesterol = mmol/L
Male	2017	75	6	18	0	13.05	4.9	12.5	47	43	60	2	9.6	10.3301	6651.41	3894.25	400.1	1602.6	204.4		BUN (Blood Urea Nitrogen) = mmol/L
Female	2017	38.2	1	21	0	9.825	4.1	11.9	44	23	48	0.6	8.6	9	7382.89	4314.43	591	566.7	92.5		Albumin = gr/dL
Male	2017	65.6	22	32	0	13.275	3.5	10.8	43	20	63	0.6	8.6	7.2656	5552.44	2646.68	671.4	618.638	158.512		Globulins = gr/dL
Male	2017	71	15	18	0	10.275	5.9	13	41.5	42	66.5	1.1	10.35	10.6278	7862.43	3110.47	1095.99	3141.95	80		Creatinine = mmol/L
Female	2017	100	48	22	0	10	9.6	14.4	49	44	42	1.5	11.1	41.9904	8363.83	2675	1219.88	2011.33	410.625		Triglycerides = mmol/L
Female	2017	34.1	1	18	0	11.575	7.55	8.95	48.5	24.5	63	0.8	9.3	11.6482	7844.55	3555.66	460.913	905.375	71.55		Glucose= mmol/L
Female	2017	73.9	1	45	0	12.275	7	14.7	45.5	32	51	1.55	10.7	6.41097	10457.5	9493.08	942.237	1807.27	186.525		IgG (Parasite specific IgG)= Arbitrary Units
Male	2017	37	3	32	0	10.75	5.85	11.45	46.5	34.5	35	1.7	10	4.06856	6188.98	2224.07	965.575	1180.17	27.225		Neut (Neutrophils)= cells/uL
Male	2017	67.9	17	25	0	12.675	6.3	7.9	45	29	71	0.8	8.5	11.1551	6113.36	2209.29	766.788	766.6	343.35		Lymph (lymphocytes)=cells/uL
Female	2017	41.6	14	30	0	11.575	6.9	10.9	39	51	57	1.3	9.7	7.14622	5824.57	6417.9	474.188	1077.3	254.475		Mon (monocytes)= cells/uL
Male	2017	98.1	14	18	0	10.475	8.3	9.8	53	45	73	0.9	10.9	29.4446	6287.12	5044.55	653.587	969.212	263.725		Eos (eosinophils)= cells/uL
Female	2017	70.9	12	15	0	11.2	4.8	11.5	33	31	87	0.8	10	30.2551	6795.41	4068.25	948.55	807.2	61.675		Baso (Basophils) = cells/uL
Male	2017	123	8	19	0	13.85	6	7.1	41	48	65	2.1	8.5	31.2739	5438.81	2096.18	537.562	1076.66	367.65
Male	2017	21.2	12	43	1	18.5	10.2	15.1	47	32	69	0.9	6.6	3.5412	9845	2590.2	960.917	522.367	121.9
Male	2017	101.7	12	18	0	12	4.55	11.6	41.5	34.5	57.5	1.5	10.1	14.3311	8094.54	5668.19	1190.34	870.062	381.1
Male	2017	29.8	34	43	1	10.2	5.65	9.2	48.25	32	69.5	1.075	9.6	10.315	8763	2560.8	802.093	819.902	140.95
Male	2017	47.7	23	26	0	10.825	3.1	10.3	41	29	64	0.5	9.7	16.9776	4911.12	4731.71	643.062	889	187.225
Female	2017	29	20	31	0	10.8	3.4	16.7	41	33	62	0.9	8.7	5.90045	5911.24	2480.8	894.438	954.275	108.225
Male	2017	41.6	11	21	0	11.525	3.3	8.5	41	19	60	0.6	6.8	24.319	8538.56	4550.34	813.837	705.562	318.488
Female	2017	35.4	3	32	0	11.15	5.7	10.05	43.5	27	77.5	0.95	8.55	7.48679	5755.86	3582.49	638.125	771.375	24.975
Male	2017	65.3	40	33	0	9.875	4.5	15.75	48	36.5	63	1.4	10	7.64814	5570.29	3468.95	691.062	794.425	319.5
Female	2017	68.1	2	28	0	11.325	5.4	10.7	47	33	57	1.2	10.8	6.42912	5601	3455.49	948.5	1661.75	87.5
Male	2017	23	34	32	1	9.35	4.6	5.9	42	32	52	0.8	4.5	3.738	7896	1735	575	809.48	0
Female	2017	101	33	12	0	10.425	7.6	12.6	46	42	88	1.8	6.3	56.3034	8369.7	5803.18	2513.05	1928.5	385
Male	2017	59.3	34	41	0	9.2	3.4	7.125	40.25	24.75	47.75	1.65	8.15	12.7868	5841.9	5021.78	1943.19	809.562	85
Male	2017	104	2	14	0	11.625	6.4	6	33	57	57	2	11.7	19.735	4385.62	5570.14	539.6	1750.18	198.262
Male	2017	79.3	3	21	0	11.95	3.7	8.6	43	25	58	0.6	7.3	14.9796	5064.15	2826.53	838	2313.01	292.613
Male	2017	53	7	24	0	12.825	5.65	5.2	36.5	47	30.5	1.4	9.95	8.10919	4469.32	3804.38	2035.7	957.15	170
Female	2017	91.2	4	16	0	12.425	6.2	22.3	42	33	97	5.9	12.5	19.0046	5807.3	4682.64	1862.8	1680.7	412.5
Male	2017	39.2	9	41	0	9.65	5.2	6.85	37.5	24.5	47	0.65	8	6.08978	5860.4	2788.56	1015.94	1795.76	169.537
Female	2017	51.25	16	19	0	10.025	5.6	8.6	44	31.5	40	1.5	8.4	18.2902	6851.08	4197.5	1406.45	1369.85	185.387
Female	2017	90.33	54	18	0	8.975	3.95	12.1	35.5	48	55	1.6	9.55	20.1728	10884.4	7075.64	1180.84	1047.4	163.762
Female	2017	36	2	27	0	11.325	4.9	15.05	36	40.5	114	1.95	8.2	8.11125	5795.8	2879.45	1044.34	1286.84	86.1375
Male	2017	34.14	14	31	0	10.05	3.3	4.8	39	30	54	0.6	8.1	18.0012	6891.77	4906.34	722	452	458.938
Female	2017	69.123	2	20	0	10.775	4.2	7.4	41	32	63	1	8.5	25.3252	6925.51	5841.16	884.875	1641.5	188.5
Male	2017	64.4	3	14	0	11.525	4.85	5.15	44.5	21.5	59	0.7	7.15	4.12714	4607.3	5130.49	1541.42	1224.78	766.95
Female	2017	72.2	8	24	1	15.6	4.6	5.9	42	32	52	0.8	7.6	9.56936	10025	1433.13	1513.65	1479.7	183.75
Female	2017	59	16	29	0	10.075	6.4	8.45	41.5	30.5	82	1.05	7.85	4.92489	6587.04	2730.72	1036.94	2058.27	64.725
Male	2017	17	7	38	0	10.825	4.63333	10.3667	43	31.3333	49.6667	1.43333	9.73333	4.525	10652.8	5410.08	1023.25	572.75	304.2
Female	2017	23	148	31	1	9.15	5.65	9.2	48.25	32	69.5	0.9	5.8	2.75	4703.6	3273.8	552.4	316.6	0
Male	2017	6.32	33	5	1	10.35	5.6	5.9	40	28	52	0.8	5.5	1.5	2241.5	2006.97	497.4	867.2	0
Female	2017	5	77	28	1	10.45	4.6	5.9	42	32	52	0.8	5.5	2.35	8145.55	1845	1436.45	1162.5	0
Female	2017	19	33	35	1	8.75	4.6	11	42	23	52	0.8	5.5	3.25	4801.6	1628.5	775.5	139.65	0
Female	2017	12.3	77	36	1	9.6	5.4	5.9	42	32	52	0.8	6.3	5.1	4399.55	2303.32	843.025	653.1	0
Female	2017	10.2	18	43	1	8.7	4.6	5.9	42	29	52	0.8	5.5	6.7	2398.93	2460.22	261.375	280.425	0
Male	2017	11.5	53	41	1	9.1	6.1	6.7	42	32	52	0.8	5.5	4.52	4241.38	2190.75	484	307.625	46.125
Male	2017	9.1	12	48	1	9.95	4.1	5.9	42	27	52	0.8	5	3.655	5808.12	2403.52	371.4	168.825	108.45
Female	2014	19.2	10	39	1	6.4	5.1	8.7	41	31	69	0.8	5	2.8	10369	3542	560	840	0
Female	2014	12.5	6	41	1	10	5.2	6.2	39	22	71.2	0.9	5.5	1.9	9456	4023	650	1023	0
Male	2014	36.4	5	32	0	9.1	6.1	8.9	45	36	69.5	1.05	8.8	2.3	12568	4987	756	1865	0
Male	2014	19.4	32	31	1	9.2	5.5	5.5	41	25	42	0.8	6.1	2.2	11830	4732	182	1456	0
Male	2014	23.45	12	36	1	6	4.8	6.5	35	29	63	1.4	5.1	0.6	7800	5850	150	900	0
Male	2014	61.2	1	18	0	11.6	5.5	5.9	39	29	54	0.9	9.1	10.3	14976	9792	288	3744	150
Female	2014	22.4	56	38	1	10.1	4.6	5.9	42	32	52	1.2	5.5	2.9	12702	3654	174	870	0
Male	2014	34.5	45	25	1	6.3	5.6	11	42	23	52	0.8	5.5	11.3	10692	3888	324	1134	0
Male	2014	58.9	5	41	1	11.7	6.1	7.7	42	32	63	0.9	5	5.8	11552	2280	152	1064	0
Male	2014	75.2	1	19	0	12.5	3.95	12.1	35.5	48	55	1.6	9.55	11.1	11144	7562	0	1194	280
Male	2014	41.4	1	21	0	11.6	3.7	8.6	43	25	58	0.6	8.3	9.8	13832	9576	532	2660	560
Female	2014	72.1	2	25	0	12.5	6.2	22.3	42	33	97	4.9	11.5	21.5	9072	5544	168	2016	100
Male	2014	31.2	0.5	19	0	10.4	3.3	4.8	39	30	54	0.6	8.1	9.2	14100	2256	188	1128	0
Male	2014	51.2	4	39	0	12.3	5.65	6.2	36.5	47	30.5	1.2	9.95	14.9	10854	4416	268	536	0
Male	2014	38.2	36	15	0	9.5	4.9	15.05	36	40.5	104	1.45	8.2	30.5	8556	8370	0	1674	210
Male	2014	58.1	1	25	0	13.4	5.4	10.7	47	33	57	1.2	9.8	14.4	11297	4482	0	143	0
Female	2014	12.3	6	41	1	8.5	4.6	5.9	42	29	52	1	5.5	7.9	10080	2240	0	3520	0
Female	2014	59.4	22	48	1	6	4.6	5.9	42	32	52	0.8	7.6	0.1	11552	3280	152	1164	0
Male	2014	64.3	3	16	0	10.1	4.2	7.4	41	32	63	1	8.5	25.7	9500	9500	0	0	120
Male	2014	54.2	1	21	0	9.5	3.4	7.125	40.25	24.75	47.75	1.65	7.9	11.2	7644	7176	0	780	100
Male	2014	49.5	1	35	1	9.9	5.6	8.6	44	31.5	40	1.5	9.1	4.8	16104	7808	488	0	0
Female	2014	71.2	2	21	0	13	5.5	8.9	51	37	96	6.2	9.6	9.1	12675	6825	0	0	120
Male	2014	53.4	1	14	0	12.2	5.6	8.4	44	31.5	40	1.4	8.5	15.2	10658	5012	650	540	0
Male	2014	11.6	12	42	1	8.8	4.6	5.9	42	29	52	0.8	5.5	2.1	11254	3256	125	1452	50
Female	2014	31.64	5	12	0	9.8	4.3	7.6	41	32	61	0.9	8.6	18.3	8160	5463	102	408	0
Male	2014	69.4	1	26	0	11.9	5.4	10.7	47	33	57	1.2	9.8	12.3	12998	4656	0	1746	0
Female	2014	12.3	15	45	1	7.2	4.6	5.9	41	33	51	0.8	7.4	6	25276	1420	0	852	0
Male	2014	75.1	15	11	0	11.8	6.1	20.3	42	33	89	5.9	9.5	14.4	5452	5336	232	580	120
Female	2014	81.2	3	21	0	12.2	4.59	10.6	42.5	33.6	57.5	1.4	9.6	16.2	9312	8924	0	1164	190
Female	2014	35.6	15	24	0	11.2	4.1	15.1	42.5	71	63	0.95	8.95	38.7	13530	8924	2952	5166	680
Female	2014	29.5	1	24	0	11.8	9.4	14.2	48	43	41	1.2	10.9	41	10764	3276	5616	3276	0
Male	2014	56.1	5	36	1	12.2	5.7	10.1	44	25	79	1	8.4	6	16124	9730	0	1668	350
Male	2014	79.4	3	25	0	10.9	4.05	11.9	36	47	56	1.5	9.6	17.9	12768	12502	266	1064	0
Male	2014	42.1	2	55	1	10.7	4.6	6.1	43	31	53	0.9	4.5	1.7	11256	4521	365	850	0
Female	2014	51.2	1	14	0	10.1	8.1	9.7	52	41	71	1	9.4	34.7	11128	7704	0	2354	0
Male	2014	59.8	6.5	35	1	10.9	4.9	6.1	44.5	21.5	59	0.7	7.2	8.9	19788	6111	291	2910	0
Female	2014	46.5	1	43	1	12.4	4.6	6	43	31	50	0.9	7.4	2.8	13104	6300	252	5292	120
Female	2014	64.2	6	16	0	12.9	6.4	5.9	41.5	30.5	82	1.05	7.9	6	4940	2660	120	100	0
Male	2015	23.1	12	35	1	8.1	5.5	9.1	46	31	70	1.1	5.6	2.3	12356	2310	980	850	0
Female	2015	78.4	5	14	0	11.5	5.1	10.6	46	34	57	1.4	10.9	16.2	13245	6532	1026	1568	220
Female	2015	69.7	4	18	0	9.5	6.1	8.1	44	29	69	0.9	8.6	14.6	16015.5	5338.5	10677	1423.6	320
Male	2015	56.2	2	16	0	12.4	5.7	5.1	38	45	32	1.3	10.1	19.4	8732.08	5613.48	155.93	935.58	0
Male	2015	33.5	118	28	1	7.5	5.8	8.1	43	28	56	1	7.6	3.1	8288.56	1776.12	148.01	3848.26	0
Female	2015	85.6	3	12	0	12.1	4.7	11.2	43	36	56	1.4	10.4	32.1	8429.85	3723.49	518.76	389.07	0
Female	2015	37.2	78	21	0	9.5	9.5	14.6	50	46	42	1.5	10.9	75.2	16750.8	15913.3	1256.31	5444.01	850
Male	2015	84.5	1	16	0	14.7	4.3	7.6	42	34	61	1.1	8.4	48.6	12760.8	7525.6	654.4	10797.6	0
Female	2015	41.3	26	15	0	11.6	5.5	9.6	41	32	43	1.4	8.6	55.1	15110.1	6296.12	4971	549.46	420
Female	2015	51.4	12	18	0	11.1	4.4	7.3	41	26	48	1.4	7.1	22.1	9171.36	5158.89	0	3821.4	340
Female	2015	19.8	35	36	1	9.3	4.1	8.1	44	33	45	1	6.4	4.5	9199.08	19198.1	1199.88	9599.04	890
Female	2015	23.4	8	31	0	14	4.6	9.6	44	16	57	0.5	4.6	5.8	5738.04	6147.9	3073.95	5123.25	950
Female	2015	38.9	17	19	0	13.5	4.1	6.1	44	15	48	0.6	4.9	7.4	9874.07	3399.27	161.87	2428.05	0
Female	2015	31.2	12	18	0	14.1	5.5	9.4	42	21	43	1.2	8.5	10.2	15955.8	3146.22	224.73	1797.84	203
Male	2015	29.1	22	36	1	9.8	5.1	8.1	36	26	44	0.9	6.1	5.1	12654	3265	1023	543	0
Female	2015	21.6	1	12	0	11.7	5.3	6	40	28	46	1.2	5.6	13.5	13664	2243.34	407.88	1223.64	0
Female	2015	47.9	2	16	0	13	5.4	4	41	31	61	1.1	7.8	16.1	4969.02	4614.09	354.93	1656.34	320
Female	2015	22.5	2.5	14	0	15.1	4.2	12.1	43	27	43	1.4	8.1	23.5	10832.5	1645.44	100	685.6	0
Male	2015	85.6	2	16	0	13.5	6.8	10.2	41	26	51	1.2	9.8	12.1	19491	2079.04	100	2079.04	120
Male	2015	102.4	6	21	0	13.9	6.4	9.8	39	28	56	1.3	10.4	14.6	8296.88	12333.2	448.48	896.96	450
Male	2015	91.2	3	21	0	10.7	4.1	9.5	43	25	61	0.9	7.2	28.4	7297.29	9168.39	250	1683.99	210
Female	2015	24.2	1	12	0	15	6.2	8.6	40	37	78	0.9	6.3	39.6	18378.6	4266.47	1312.76	3281.9	120
Female	2015	39.4	35	27	1	8.6	4.8	6.1	44	25	52	0.8	6.4	6.1	13814.3	5790	468.28	1873.12	0
Female	2015	23.6	23	32	1	11.4	5.2	5.2	41	21	44	1.1	5.9	2.1	11478.4	3544.8	210	1012.8	100
Female	2015	71.2	127	16	0	9.1	4.9	11.2	44	29	59	1	8.9	24.1	17239.7	8468.6	302.45	3024.5	850
Male	2015	84.5	13	15	0	8.4	3.9	9.5	42	22	61	0.8	6.2	45.1	7448.76	8036.82	250	3724.38	410
Male	2015	32.1	5	19	0	10.6	5.2	7.8	43	24	51	1.2	6.9	34.2	6663.69	3143.25	2137.41	502.92	210
Female	2015	43.6	1	21	0	14	5.5	8.8	42	19	55	0.8	7	19.4	11749.3	3405.6	340.56	851.4	260
Female	2015	29.6	1	12	0	11.9	5.1	16.7	43	31	61	1	8.5	14.9	15955.8	3146.22	224.73	1797.84	203
Male	2015	33.4	5	21	0	12.3	4.2	7.125	43	26	49	1.3	9.15	21.2	8217	6080.58	164.34	1807.74	350
Female	2015	22.6	1	18	0	11.2	6.1	10.1	44	24	61	1.1	8.7	10.2	22211.6	2249.28	281.16	1686.96	0
Female	2015	36.4	1	12	0	12.9	4.9	13.4	47	19	61	0.6	4.7	6.5	12173	6716.16	209.88	1469.16	0
Female	2015	29.4	1	19	0	13.2	3.2	16.8	32	20	54	1	2.3	1.6	25475.5	3489.8	697.96	3140.82	0
Male	2015	59.4	3	12	0	11.7	5.4	8.6044	44	22	39	0.7	6.7	23.4	11293.8	2953.75	100	2780	0
Male	2015	33.8	1	15	0	9.8	4.5	12.4	44	39	61	1	9.7	10.8	9856	5231	450	950	201
Male	2015	41.6	8	13	0	12.8	5.4	8.4	46	24	57	1.6	5.8	15.4	14568.8	4762.89	4202.55	3642.21	0
Male	2015	54.6	1.5	32	0	9.8	3.5	6.9	34	26	46	0.3	2.1	6.8	18574.4	5256.9	7359.66	3154.14	120
Female	2015	28.4	30	29	1	9	5.85	6	47	34.5	36	1.2	5.5	4.4	9843.57	3388.77	161.37	2581.92	0
Female	2015	21.6	12	35	1	9.8	6.3	6.5	45	31	71	0.8	8.5	2.4	10617.8	3103.65	163.35	2450.25	0
Male	2015	22.5	20	41	1	9.4	6.9	10.1	39	51	57	1.3	4.7	3.6	11868.5	2142.92	100	2472.6	0
Female	2015	43.6	2.5	16	0	11.6	5.3	12.3	45	48	55	1.1	6.1	19.4	9054.38	2162.24	0	1891.96	0
Female	2015	19.4	75	36	1	8.4	5.8	9	45	31	51	1	4.7	1	14946.3	5544.61	2892.84	723.21	100
Male	2015	27.8	53	33	1	7.1	6.1	9.7	48	38	61	0.7	5.9	4.1	7890	2314	150	650	0
Female	2015	59.4	5	31	0	10	5.1	12.1	45	33	51	0.9	6.9	7.9	12364	6534	160	980	150
Male	2015	12.4	37	12	0	8.9	3.5	11	36	42	56	1.1	5.5	33.2	8239.77	7387.38	7103.25	5682.6	250
Female	2015	24.5	5	23	0	9.6	4.9	8.1	39	29	64	1.1	6.2	12.1	11264	6450	1200	960	0
Male	2015	41.2	1.5	18	0	12	5.4	9.2	44	31	86	1.2	5.7	2.4	9875	4236	550	450	0
Male	2015	36.4	10	23	0	8.9	5.1	11.2	42	19	48	0.75	5.2	6.38	9876	4642	1200	1780	120
Male	2015	102.4	2	12	0	12.5	6.5	14.5	45	34	42	1.7	14.5	45.1	10254	6453	850	2543	453
Female	2015	89.1	1	13	0	11.2	7	18.3	44	40	40	1.9	15	31.5	9345	4562	1200	987	121
Male	2015	64.2	1	26	0	10.2	5.6	6	41	29	51	1.1	6.9	10.4	9856	5365	1080	940	102
Male	2015	54.2	1.5	21	0	11.9	5.5	8	43	31	49	0.9	5.5	11.3	13281.8	1362.24	170.28	510.84	0
Female	2015	49.6	4	26	0	9	5.6	12.1	44	29	56	1.2	7.6	14.5	16015.5	5338.5	10677	1423.6	0
