# Supplementary material for: Immune-mediated hookworm clearance and survival of a marine mammal decrease with warmer ocean temperatures
Source: eLife. 2018 Nov 6;7:e38432. doi: 10.7554/eLife.38432 (PMC6245726; doi:10.7554/eLife.38432)
Supplement: Figure 2—source data 1. [file elife-38432-fig2-data1.xlsx]

## Sheet: Sheet1
ID	Sex	Ivermectin	group	attendance	Growth rate	Hookworm Burden	Infectious Period	mortality	Hg1	Hg2	Hg3	Hg4	Hg	Cholesterol	BUN	Albumin	Globulins	Creatinine	Triglycerides	Glucose	IgG1	IgG2	IgG3	IgG4	IgG	Neut1	Neut2	Neut3	Neut4	Neut	Lymph1	Lymph2	Lymph3	Lymph4	Lymph	Mon1	Mon2	Mon3	Mon4	Mon	Eos1	Eos2	Eos3	Eos4	Eos	Baso1	Baso2	Baso3	Baso4
1	Female	no	survived	11.25	53.1	2	15	0	14.5	10.5	9.5	10.5	11.25	5.5	7.8	44	25	55	0.8	7.9	0.1	5	28.4066	2	8.87666	7560.43	8013.54	8553.6	6045.32	7543.22	1930.5	4304.4	2980.8	2450.32	2916.51	456	659	259.2	450	456.05	223	540	1166.4	1293	805.6	0	0	450	430
2	Female	no	survived	12.8571	73.9	5	21	0	14	9.1	14	16	13.275	5.5	8.9	51	37	96	6.2	9.6	0	8	35.04	6.84986	12.4725	8012.3	7684.2	7134.2	7774	7651.18	2433.6	5736.4	6384.2	5232.5	4946.68	562	657	847	747.5	703.375	340	570	980	897	696.75	0	234	320	299
4	Male	no	died	3.75	6.32	33	5	1	12.6	8.1			10.35	5.6	5.9	40	28	52	0.8	5.5	0	3			1.5	3190	1293			2241.5	1547.49	2466.45			2006.97	390	604.8			497.4	100	1634.4			867.2	0	0
5	Male	yes	control	7.64706	75	0	0	0	16.1	11.2	12.7	13.1	13.275	6.2	9.1	54	32	67	1.6	10.4	0.9	2.01635	0	0	0.729089	9234.02	8012.3	6600	6100	7486.58	2608.2	2874.4	2000	3349	2707.9	623	657	500	500	570	200	320	300	450	317.5	0	0	0	0
6	Male	yes	control	7.10526	92.8	0	0	0	14.1	10	12.5	13.1	12.425	5	8.4	53	19	41	1.7	7.2	0	2	2	0	1	9300.23	8321.2	9960.3	4503.4	8021.28	2019	3293	4337.55	3940	3397.39	723	768	642.6	780	728.4	120	430	963.9	320	458.475	0	0	0	0
7	Male	no	survived	20.3571	105.4	3	14	0	18.7	9.5	15.8	16.2	15.05	5.55	8.6	49	21.5	60	0.65	10.6	0.2	21	63.71	12	24.2275	6758.4	4881.6	5880.6	4903.2	5605.95	3210	5873.6	6014.25	3484	4645.46	627	813.6	783	1069.2	823.2	342	1017	980	267.3	651.575	0	133.65	335	100
8	Female	yes	control	8.82353	33.3	0	0	0	18.2	11	11.4	14	13.65	6	13.2	46	39	88	1.1	7.7	0	0	2.36749	0	0.591872	9608.4	7345.3	6104.7	5043.2	7025.4	2543.4	3450	4788	4598	3844.85	423.9	755	598.5	650	606.85	706.5	430	478.8	450	516.325	0	0	0	0
10	Male	no	died	6.66667	12	10	30	1	11.5	9.5	6	6	8.25	4.6	5.9	42	32	52	0.8	5.5	0	6	8	0	3.5	6540	5678			6109	1547.49	1736.55			1642.02	340	604.8			472.4	320	450			385	0	0
11	Male	no	survived	6.77419	17.5	157	32	0	12.4	6.6	6.3	6.2	7.875	4.05	14.65	42.5	73	61	0.9	8.75	6	30.893	63.71	21.4	30.5007	7212.15	4440	9474.3	8532	7414.61	5370.75	6960	3757.05	3839.4	4981.8	767.25	240	1306.8	426.6	685.163	1994.85	360	1143.45	853.2	1087.88	0	0	326.7	0
12	Male	no	survived	12.8571	81	1	12	0	14.5	12.5	13.5	14.5	13.75	4.5	11.2	44	27	57	2.7	10.7	0	12.5	31	5.03609	12.134	9874.2	8023.1	7930.3	7545.6	8343.3	2354.2	6839.3	6102.3	2711.7	4501.88	675	667	995	117.9	613.725	567	780	1340	1296.9	995.975	0	390	560	0
13	Female	no	survived	8.57143	83.6	3	20	0	14	9.5	8	11	10.625	5.9	15.4	45	45	59	1.7	9	0	6	12	3.96119	5.4903	7564	8763.32	6873.1	6123.4	7330.95	2948.2	6736.3	6430.2	3450.3	4891.25	537	876	984	1234	907.75	329	847	2309	1673	1289.5	0	450	680	0
14	Female	yes	control	5.35714	74.4	0	0	0	18.7	15	7.8	9	12.625	6.4	12	43	39	44	1.4	9.7	0	0.1	5	0	1.275	7956	8302.5	6320.12	5893.32	7117.98	1170	1215	1847	1947	1544.75	468	607.5	730	840	661.375	1521	0	120	320	490.25	0	0	0	0
15	Male	yes	control	6.34615	47.7	0	0	0	15.6	14.5	11.5	12.5	13.525	4.5	11.4	46	43	60	1.2	9.3	0	0.2	9	0	2.3	6696	5432.5	5976.45	5034.32	5784.82	6556.5	3638	3355.2	3028	4144.43	279	467	419.4	540	426.35	418.5	150	209.7	150	232.05	0	0	314.55	0
16	Male	no	survived	11.25	75	6	18	0	13.6	13	12.1	13.5	13.05	4.9	12.5	47	43	60	2	11.6	0.2	12	19.1205	10	10.3301	8593.2	5997.6	7106.4	4908.45	6651.41	1339.2	3794.4	6937.2	3506.2	3894.25	334.8	367.2	338.4	560	400.1	111.6	1958.4	2030.4	2310	1602.6	0	310	507.6	0
17	Female	no	survived	7.5	38.2	1	21	0	14.5	8.3	8	8.5	9.825	4.1	11.9	44	23	48	0.6	8.6	0.1	5	21	9.9	9	8012.54	7456.32	6578.3	7484.4	7382.89	2394.2	5837.2	5937.5	3088.8	4314.43	330	656	784	594	591	340	540	674	712.8	566.7	0	120	250	0
18	Male	yes	control	17.6923	111	0	0	0	17.6	15.2	10	14.5	14.325	8	9.2	40	44	91	9	9.8	0.1	0.9	4.13964	1	1.53491	8870.4	7034.5	6093.43	5049.03	6761.84	1382.4	1939	2019	2303	1910.85	230.4	546	500	657	483.35	576	440	340	230	396.5	0	0	0	0
19	Male	no	survived	12.8571	65.6	22	32	0	14.7	13	12	13.4	13.275	3.5	10.8	43	20	63	0.6	8.6	2	6	17.0624	4	7.2656	6544.8	2670.3	7771.5	5223.15	5552.44	909	2173.5	3956.4	3547.8	2646.68	636.3	807.3	847.8	394.2	671.4	545.4	558.9	1271.7	98.55	618.638	0	0	492.75	141.3
23	Female	yes	control	7.2	55.8	0	0	0	15.6	14.8	11.6	13.5	13.875	5.8	8.7	49	24	47	0.9	7.3	0.1	0.9	13.4189	1.2	3.90471	7340.32	6540.1	5522.4	5090.2	6123.26	1837	2038	2527.2	3465	2466.8	583.2	676	561.6	647	616.95	600	500	748.8	650	624.7	0	0	0	0
31	Female	no	died	2.30769	5	77	28	1	14.1	6.8			10.45	4.6	5.9	42	32	52	0.8	5.5	0.4	4.3			2.35	5672	10619.1			8145.55	1827	1863			1845	451	2421.9			1436.45	89.4	2235.6			1162.5	0	0
38	Male	yes	control	7.94118	13.3	0	0	0	19.5	15.9	14.8	15	16.3	3.9	6.8	48	15	69	0.6	6.8	0.1	0.2568	4.25877	0.2	1.20389	7968.6	6230.4	6120.9	5040.8	6340.18	1153.35	1383	1750	2038	1581.09	524.25	645	570	620	589.812	838.8	670	780	450	684.7	0	0	0	0
39	Male	no	survived	11.6129	71	15	18	0	14.5	6.8	6.4	13.4	10.275	5.9	13	41.5	42	66.5	1.1	10.35	2	15	17.1283	8.3827	10.6278	9834.43	8757.45	5627.25	7230.6	7862.43	1984.4	3470.34	4588.65	2398.5	3110.47	983.3	2245.5	417.15	738	1095.99	650	9880.2	1668.6	369	3141.95	0	0	320	0
41	Female	no	survived	20.3226	100	48	22	0	14.9	11.1	6	8	10	9.6	14.4	49	44	42	1.5	12.1	6	58.9616	72	31	41.9904	9873.9	8190	8379	7012.4	8363.83	1001.7	4095	3249	2354.3	2675	1431	1102.5	1026	1320	1219.88	1860.3	1575	2736	1874	2011.33	0	787.5	855	0
42	Female	no	survived	8.33333	34.1	1	18	0	12.5	11.2	10.1	12.5	11.575	7.55	8.95	48.5	24.5	63	0.8	9.3	2.0145	14.1915	18.3869	12	11.6482	8912.25	7042.95	8442.9	6980.1	7844.55	524.25	6593.4	4006.8	3098.2	3555.66	314.55	299.7	572.4	657	460.913	733.95	1048.95	858.6	980	905.375	0	0	286.2	0
44	Female	yes	control	7.67442	34.1	0	0	0	20.7	15.2	10.4	12.8	14.775	5	14.3	43	36	42	1.3	9.5	0.5	1.025	1.95794	0.1	0.895735	5022	5034.1	3330	3420.3	4201.6	1458	2300.2	4079.25	3494	2832.86	1377	564	333	430	676	243	320	416.25	350	332.312	0	0	83.25	0
45	Female	no	survived	18	73.9	1	45	0	14.5	12.1	10.4	12.1	12.275	7	14.7	45.5	32	51	1.55	10.7	1.23	6.9108	15.4891	2.014	6.41097	8945.32	10465.2	14549	7870.5	10457.5	1986.7	2754	19398.6	13833	9493.08	484.4	734.4	1119.15	1431	942.237	1092	4406.4	1492.2	238.5	1807.27	0	0	746.1	0
49	Male	no	survived	3.65854	37	3	32	0	13.5	9.7	9.3	10.5	10.75	5.85	11.45	46.5	34.5	35	1.7	10	1	2	6.9108	6.36346	4.06856	7361.43	5989.5	6904.8	4500.2	6188.98	2376	1524.6	3452.4	1543.3	2224.07	847.3	1633.5	616.5	765	965.575	1092	1415.7	1233	980	1180.17	0	0	108.9	0
50	Male	no	survived	6.66667	67.9	17	25	0	14.5	13.2	9.5	13.5	12.675	6.3	7.9	45	29	71	0.8	8.5	2.3	16.7	19.1205	6.5	11.1551	3945.6	3491.23	12917.7	4098.92	6113.36	246.6	6309.4	1041.75	1239.4	2209.29	1972.8	546	208.35	340	766.788	1109.7	890	416.7	650	766.6	0	540	833.4	0
51	Male	yes	control	9.70588	51.4	0	0	0	17.7	12.1	13.4	15.1	14.575	8.13333	16.4667	45.3333	42	77	1.06667	9.13333	0	4.43769	5.81863	4.7365	3.74821	8399.7	6601.39	5927.4	4528	6364.12	2478.6	1718.17	2844	3948	2747.19	1790.1	452.15	476	510	807.062	1101.6	271.29	340	450	540.722	0	0	0	0
52	Female	no	survived	8.46154	41.6	14	30	0	14.9	10.9	9.4	11.1	11.575	6.9	10.9	39	51	57	1.3	9.7	2	8	12.1	6.48487	7.14622	6458.4	4878.9	6642	5319	5824.57	5475.6	11071.4	6199.2	2925.45	6417.9	842.4	375.3	590.4	88.65	474.188	1123.2	2064.15	1033.2	88.65	1077.3	140.4	375.3	147.6	354.6
53	Male	no	survived	23.5714	98.1	14	18	0	15.1	10.2	6.4	10.2	10.475	8.3	9.8	53	45	73	0.9	10.9	4	68	43	2.77853	29.4446	6540.32	4340	5756.4	8511.75	6287.12	3757	6300	7109.34	3011.85	5044.55	636.3	840	221.4	916.65	653.587	930	1960	332.1	654.75	969.212	0	280	774.9	0
54	Female	no	survived	18.4615	70.9	12	15	0	17.5	7.5	7.4	12.4	11.2	4.8	11.5	33	31	87	0.8	10	3.2	64.567	41.2434	12.01	30.2551	7226.1	6540.32	7921.8	5493.4	6795.41	2097.9	5837.3	5134.5	3203.3	4068.25	1631.7	554	733.5	875	948.55	699.3	893	733.5	903	807.2	0	100	146.7	0
56	Male	yes	control	10	96.8	0	0	0	14.5	12.1	9.5	11.1	11.8	7.3	6.36667	47.6667	31.6667	77.6667	0.9	11.4	0.1	2.19178	4.25877	2.19178	2.18558	4730.4	5967	5395.5	4878.9	5242.95	2759.4	4212	3924	6880.5	4443.98	1281.15	468	196.2	250.2	548.888	1084.05	819	98.1	500.4	625.387	0	134	96	0
57	Male	yes	control	17.4194	69.7	0	0	0	15	12.8	12	13	13.2	8	9.2	40	44	91	9	12.8	0.1	2	2	1	1.275	9737.1	7980.4	6615	5483.3	7453.95	3612.15	4938	2646	2938	3533.54	1413.45	456	551.25	550	742.675	471.15	650	1212.75	450	695.975	0	0	0	0
76	Male	yes	control	8.33333	37.1	0	0	0	15.4	10.8	9.1	10.1	11.35	7.7	10.8	55	24	84	0.7	10.5	1.20383	4.3	2.1238	1.0236	2.16281	6735	5026.05	4987	4082	5207.51	2028	3449.25	3029	4500	3251.56	736.3	492.75	509	570	577.013	850	788.4	650	550	709.6	0	0	0	0
77	Male	no	survived	26.6667	123	8	19	0	16.2	15.8	10.2	13.2	13.85	6	7.1	41	48	65	2.1	8.5	4.3	69.7755	42	9.02	31.2739	8761.3	7335	2895.75	2763.2	5438.81	1765.8	2347.2	3429.3	842.4	2096.18	373.4	1173.6	263.25	340	537.562	1029	2053.8	473.85	750	1076.66	0	733.5	737.1	0
78	Male	yes	control	7.05882	50.8	0	0	0	16.5	11.2	9.1	10.3	11.775	8.35	11.05	48	53	66.5	1.65	11.5	1.2	6.67121	2.36452	0.5876	2.70583	6264	5286.6	4958.3	10432.8	6735.43	1983.6	4085.1	2938	5030.1	3509.2	1148.4	720.9	870	931.5	917.7	835.2	1561.95	560	745.2	925.588	208.8	120.15	0	1117.8
82	Female	yes	control	13.6364	68.9	0	0	0	17.8	11.9	10.1	11.1	12.725	7.3	7.83333	42	33.6667	52.6667	1.36667	6.6	0.816543	1.42352	9.33526	1.23	3.20133	6373	4015.8	5715.9	7686	5947.67	2093	3055.5	2562.3	3705.75	2854.14	747.3	436.5	197.1	549	482.475	450	873	1281.15	1372.5	994.163	0	174.6	98.55	137.25
85	Male	yes	control	7.05882	60.3	0	0	0	14.2	11.2	9.6	12.1	11.775	6.1	8.6	53.5	28.5	79.5	0.8	9.1	1.2	2.19821	8.53895	2.123	3.51504	8739	7362	12917.7	5930	8737.17	1583	2302	5208.75	3028	3030.44	363.4	345	833.4	890	607.95	550	980	833.4	340	675.85	0	0	0	625.05
86	Male	yes	control	14.5455	67.4	0	0	0	17.2	14.2	11.9	13.9	14.3	9.3	7.7	48	32	89	1.1	8.1	0.01	5.48948	3.21	2.587	2.82412	7809.75	3780	8470.8	3472	5883.14	3003.75	4950	5538.6	2638	4032.59	720.9	567	651.6	650	647.375	480.6	270	1466.1	550	691.675	0	0	162.9
87	Male	no	died	4.61538	21.2	12	43	1	18.5	10.1	6	6.3	18.5	4.5	15.1	47	32	69	0.9	6.6	0.2	6.61482	5.01	2.34	3.5412	7019	6019.65	7560		6866.22	1450.8	3439.8	2880		2590.2	320	1842.75	720		960.917	230	737.1	600		522.367	0	245.7	120
88	Female	yes	control	14.5455	100	0	0	0	16.1	12.5	12.7	14.5	13.95	8.2	5.6	46	27	61	1.7	7.5	1.2	2.3	3.5876	2.5	2.3969	8683.9	4567.5	4762.8	3947	5490.3	2348	4828.5	3515.4	3370	3515.47	746.4	2088	793.8	703	1082.8	450	1435.5	1020.6	980	971.525	0	130.5	793.8
89	Male	yes	control	15.7143	50.8	0	0	0	14.3	11.5	10.4	9.6	11.45	6.3	7.65	45	21	62.5	0.9	8.6	0.5	1.53404	4.14551	3.2	2.34489	8637.4	4352.4	7362.9	9828	7545.17	2037	2948.4	5454	5967	4101.6	748.3	2246.4	409.05	877.5	1070.31	340	393.4	409.05	351	373.363	0	561.6	0	526.5
90	Male	no	survived	16.5789	101.7	12	18	0	17.1	9.8	8.8	12.3	12	4.55	11.6	41.5	34.5	57.5	1.5	10.1	6	32.3245	12	7	14.3311	7000	6010.65	12714.7	6652.8	8094.54	1700	6335.55	6717.2	7920	5668.19	580	1786.95	1919.2	475.2	1190.34	340	1786.95	719.7	633.6	870.062	0	324.9	1199.5	0
91	Female	yes	control	4.8	68.4	0	0	0	14.1	9.8	13.7	14.8	13.1	6.35	9.95	47	38.5	53	2.85	10.85	0.3	2.75304	2.41999	1.2	1.66826	6234	5387.4	5510.7	10357.2	6872.32	2300	4204.8	7630.2	6288.3	5105.82	1200	2365.2	423.9	924.75	1228.46	540	1051.2	565.2	554.85	677.812	0	131.4	0	0
95	Male	no	died	8.75	29.8	34	43	1	12.1	10	7.6	10.6	10.2	5.65	9.2	48.25	32	69.5	1.075	7.6	4.2	21.06	11	5	10.315	7123	6107.4	5053.08	8338.95	6655.61	2134	3167.45	2475.3	2466.45	2560.8	189	2035.8	396.32	587.25	802.093	94	1879.2	1188.96	117.45	819.902	95	369	99.8	0
96	Male	yes	control	6.81818	56	0	0	0	13.8	10.2	11.6	11.9	11.875	5	7.6	30	31	50	0.7	5.9	1.23	2.6975	2.123	0.543	1.64837	9373.23	3690	4058.3	4273	5348.63	2038	2505.5	3028	4393	2991.12	736.3	553.5	500	670	614.95	440	1107	560	650	689.25	0	0	0	0
99	Male	no	survived	24.375	47.7	23	26	0	12.9	8.6	10.4	11.4	10.825	3.1	10.3	41	29	64	0.5	9.7	4	31	21	11.9105	16.9776	2736	3450.3	4502.3	8955.9	4911.12	2736	6453.4	5837.3	3900.15	4731.71	720	456	674	722.25	643.062	576	680	980	1320	889	0	120	340	288.9
100	Female	no	survived	3.6	29	20	31	0	12.8	11	9.1	10.3	10.8	3.4	16.7	41	33	62	0.9	8.7	1	10	7	5.6018	5.90045	7563.3	7233.3	5078.25	3770.1	5911.24	2365	3693.6	2331	1533.6	2480.8	457	2154.6	582.75	383.4	894.438	857	2154.6	166.5	639	954.275	0	230	139	63.9
101	Male	no	survived	16.875	41.6	11	21	0	14.3	10.2	9.5	12.1	11.525	3.3	8.5	41	19	60	0.6	6.8	4	48	34.2759	11	24.319	8762.3	7516.6	10425.6	7449.75	8538.56	1879	5369	6754.4	4198.95	4550.34	383	1380.6	814.5	677.25	813.837	789	920.4	977.4	135.45	705.562	0	325.8	948.15	0
103	Female	yes	control	15	13.6	0	0	0	15.4	12.6	9.3	10.1	11.85	6.1	6.1	38	30	43	0.9	7.1	0	4.48084	2.3	1.2572	2.00951	9506.25	5773.95	5837.3	3947	6266.12	2193.75	3931.2	3625	4739	3622.24	1023.75	1474.2	890	1340	1181.99	1901.25	1000	320	430	912.812	0	0	0	0
105	Female	no	survived	4.44444	35.4	3	32	0	12.3	10.9	10.9	10.5	11.15	5.7	10.05	43.5	27	77.5	0.95	8.55	3	12.9472	12	2	7.48679	7693.3	6393.6	5049	3887.55	5755.86	2254.8	3999.9	5508	2567.25	3582.49	748	1198.8	459	146.7	638.125	894	999	459	733.5	771.375	0	99.9	0	0
107	Male	yes	control	18.4615	50	0	0	0	12.1	9.7	9.6	11.2	10.65	4.5	7.7	38	31	57	0.7	8.3	1	9.16443	2	1	3.29111	4938.3	4736.4	6736.3	5983	5598.5	1004.4	1678	1793	2837	1828.1	669.6	564	709	890	708.15	1590.3	230	564	744	782.075	0	0	0	0
108	Male	no	survived	11.5385	65.3	40	33	0	12.4	8.2	7.8	11.1	9.875	4.5	15.75	48	36.5	63	1.4	10	3	10	9.73429	7.85826	7.64814	7987.5	5402.4	4888.8	4002.45	5570.29	1986.8	3489.3	2968.2	5431.5	3468.95	736	786	763	479.25	691.062	849	904	785.7	639	794.425	0	0	0	1278
109	Female	no	survived	5.76923	68.1	2	28	0	14.9	9.1	9	12.3	11.325	5.4	10.7	47	33	57	1.2	10.8	2	12.7165	9	2	6.42912	4564	5870	6540	5430	5601	1034	5837.3	5363.3	1587.34	3455.49	773	834	984	1203	948.5	900	1745	1983	2019	1661.75	0	0	230	120
110	Male	no	died	2.85714	23	34	32	1	11.1	7.6			9.35	4.6	5.9	42	32	52	0.8	4.5	1	6.476			3.738	6785	7639			7212	1340	2130			1735	340	810			575	430	1188.96			809.48	0	0
111	Female	yes	control	22.5	145.4	0	0	0	14.9	12.1	11	14.9	13.225	7.3	9.8	45	23	83	0.8	8.2	1	6.72762	3	1	2.9319	11333.2	10320	9870	9820	10335.8	1149.75	1320	1098	2120	1421.94	3285	2340	3120	2500	2811.25	657	750	1100	930	859.25	0	0	0	0
113	Female	no	survived	22.8571	101	33	12	0	14.3	10.2	6	11.2	10.425	7.6	12.6	46	42	88	1.8	11.3	12	100	90	23.2136	56.3034	10886.4	7684.2	7134.2	7774	8369.7	3427.2	7038.3	8363.9	4383.3	5803.18	2419.2	2345	2503	2785	2513.05	2016	2938	1980	780	1928.5	0	450	870	220
114	Female	no	died	1.25	19	33	35	1	11.5	6			8.75	4.6	11	42	23	52	0.8	5.5	1.2	5.3			3.25	5672	3931.2			4801.6	1827	1430			1628.5	321	1230			775.5	43.9	235.4			139.65	0	0
115	Male	no	survived	14.2105	59.3	34	41	0	11.6	9.2	6.8	9.2	9.2	3.4	7.125	40.25	24.75	47.75	1.65	8.15	1.6	28.0122	19.403	2.132	12.7868	6669	5767.2	5083.2	5848.2	5841.9	2565	7638.3	6478.4	3405.43	5021.78	1410.75	1468	2038	2856	1943.19	128.25	1234	983	893	809.562	0	120	220	0
117	Male	no	survived	45	104	2	14	0	15.2	9.9	9.1	12.3	11.625	6.4	6	33	57	57	2	11.7	0.8	34.2	32.84	11.1	19.735	5479.65	4637.25	4083.2	3342.4	4385.62	5479.65	6463.7	7134.2	3203	5570.14	996.3	206.1	450	506	539.6	4483.35	721.35	903	893	1750.18	0	103.05	470	220
120	Male	no	survived	25	79.3	3	21	0	13.2	10.6	11.5	12.5	11.95	3.7	8.6	43	25	58	0.6	7.3	1.2	24.1684	21.35	13.2	14.9796	5148	6488.1	4083.2	4537.3	5064.15	1930.5	3123.9	3857.3	2394.4	2826.53	1544.4	480.6	567	760	838	4247.1	1561.95	1763	1680	2313.01	0	360.45	580	230
122	Male	no	survived	10.5882	53	7	24	0	15.3	14.3	10.2	11.5	12.825	5.65	5.2	36.5	47	30.5	1.4	9.95	0.3	23.5	4.53677	4.1	8.10919	4586.4	5438.32	4082.45	3770.1	4469.32	2433.6	4533.3	5746.3	2504.3	3804.38	1216.8	1628	2340	2958	2035.7	561.6	890	993	1384	957.15	0	210	350	120
123	Female	no	survived	36.3158	91.2	4	16	0	14.5	12.3	10.1	12.8	12.425	6.2	22.3	42	33	97	5.9	12.5	4.9	35.8	23.2	12.1183	19.0046	7203.6	6488.1	5439.04	4098.45	5807.3	2608.2	6453.54	7638.4	2030.4	4682.64	1366.2	1726	2019	2340	1862.8	1117.8	1453	1839	2313	1680.7	0	450	860	340
124	Male	no	survived	5.625	39.2	9	41	0	13.7	10.9	6.9	7.1	9.65	5.2	6.85	37.5	24.5	47	0.65	8	1.32	8.61058	10.3285	4.1	6.08978	6743	5767.2	5083.2	5848.2	5860.4	1252	2403	5242.05	2257.2	2788.56	340	2042.55	1270.8	410.4	1015.94	510	1321.65	3812.4	1539	1795.76	0	360.45	317.7	0
125	Female	no	survived	28.125	51.25	16	19	0	13.1	8.8	8	10.2	10.025	5.6	8.6	44	31.5	40	1.5	10.4	10	23.5112	28.2495	11.4	18.2902	7203.6	7624.8	4967.76	7608.15	6851.08	1763.4	4765.5	5093.3	5167.8	4197.5	364	1588.5	2812	861.3	1406.45	980	1906.2	2019	574.2	1369.85	0	278	320	143.55
128	Female	no	survived	20.8696	90.33	54	18	0	13.1	6.7	6.4	9.7	8.975	3.95	12.1	35.5	48	55	1.6	11.5	6.7	32.5807	30.2107	11.2	20.1728	9873.4	13765.5	9664.2	10234.4	10884.4	2947.4	11670.8	10736	2948.4	7075.64	564	2693.25	491.4	974.7	1180.84	109	1795.5	1310.4	974.7	1047.4	0	165	327.6	162.45
129	Female	no	survived	8.82353	36	2	27	0	12.2	11.2	9.2	12.7	11.325	4.9	15.05	36	40.5	114	1.95	8.2	1.4	12	15.645	3.4	8.11125	7624.43	6647.85	5140.8	3770.1	5795.8	3124.4	2346.3	2998.8	3048.3	2879.45	646	1694.55	856.8	980	1044.34	340	2215.95	1499.4	1092	1286.84	0	130.35	214.2	0
131	Male	no	survived	9.375	34.14	14	31	0	13.2	10.2	7.4	9.4	10.05	3.3	4.8	39	30	54	0.6	8.1	4.1	32.705	32.1	3.1	18.0012	7203.6	6488.1	5937.4	7938	6891.77	1809.3	7635.43	6353.4	3827.25	4906.34	736	748	837	567	722	109	784	348	567	452	0	120	440	1275.75
132	Female	no	survived	50.7692	69.123	2	20	0	14.2	11.6	8.4	8.9	10.775	4.2	7.4	41	32	63	1	11.6	11.1	42.1	39	9.10067	25.3252	8936.4	6982.4	7659	4124.25	6925.51	1849.4	7572	8973	4970.25	5841.16	465	586	2277	211.5	884.875	209	1983	3105	1269	1641.5	0	340	414	0
133	Male	no	survived	24	64.4	3	14	0	13.8	11.2	10.1	11	11.525	4.85	5.15	44.5	21.5	59	0.7	7.15	0.214685	7.46388	6.4	2.43	4.12714	5929.2	4637.25	4083.2	3779.55	4607.3	1944	7582	7829.3	3166.65	5130.49	1360.8	1459	2733	612.9	1541.42	486	1200	1783	1430.1	1224.78	0	502	1340	1225.8
134	Female	no	died	20.3571	72.2	8	24	1	15.6	11.5	10.1	15.6	15.6	4.6	5.9	42	32	52	0.8	7.6	3.4	11.1775	14.7	9	9.56936	7430	7206.3		5720.4	6785.57	1432.45	1130.4		1736.55	1433.13	450	2967.3		1123.65	1513.65	120	2684.7		1634.4	1479.7	0	320	415	0
135	Female	no	died	1.93548	12.3	77	36	1	12.1	7.1			9.6	5.4	5.9	42	32	52	0.8	6.3	2.3	7.9			5.1	4390	4409.1			4399.55	1827	2779.65			2303.32	440	1246.05			843.025	156	1150.2			653.1	0	0
136	Female	no	survived	9.375	59	16	29	0	12.8	9.6	8.1	9.8	10.075	6.4	8.45	41.5	30.5	82	1.05	7.85	0	12.1996	6.3	1.2	4.92489	5589	8835.75	7614	4309.4	6587.04	1856.8	3118.5	3553.2	2394.4	2730.72	1863	866.25	634.5	784	1036.94	1987.2	4504.5	761.4	980	2058.27	0	0	126.9	132
139	Male	no	survived	4.61538	17	7	38	0	14.5	9.4	8.2	11.2	10.825	4.63333	10.3667	43	31.3333	49.6667	1.43333	9.73333	1.2	6.7	8.1	2.1	4.525	8976.34	6030	9172.8	18432	10652.8	2300.43	5483.5	7232.4	6624	5410.08	583	964.8	529.2	2016	1023.25	230	844.2	352.8	864	572.75	0	0	352.8	864
148	Female	no	died	4.61538	23	148	31	1	12.3	6			9.15	5.65	9.2	48.25	32	69.5	0.9	5.8	1.2	4.3			2.75	5476	3931.2			4703.6	2314	4233.6			3273.8	500	604.8			552.4	230	403.2			316.6	0	0
150	Female	no	died	2.5	10.2	18	43	1	11.4	6			8.7	4.6	5.9	42	29	52	0.8	5.5	4.5	8.9			6.7	3109	1688.85			2398.93	1230	3690.45			2460.22	210	312.75			261.375	123	437.85			280.425	0	0
159	Male	no	died	2.5	11.5	53	41	1	12.1	6.1			9.1	6.1	6.7	42	32	52	0.8	5.5	2.34	6.7			4.52	3409	5073.75			4241.38	1983	2398.5			2190.75	230	738			484	154	461.25			307.625	0	92.25
191	Male	no	died	2.72727	9.1	12	48	1	12.5	7.4			9.95	4.1	5.9	42	27	52	0.8	5	2.31	5			3.655	4567	7049.25			5808.12	1987.34	2819.7			2403.52	309	433.8			371.4	12.3	325.35			168.825	0	216.9
[truncated: 2 more columns]
