# Supplementary material for: Immune-mediated hookworm clearance and survival of a marine mammal decrease with warmer ocean temperatures
Source: eLife. 2018 Nov 6;7:e38432. doi: 10.7554/eLife.38432 (PMC6245726; doi:10.7554/eLife.38432)
Supplement: Figure 3—source data 1. [file elife-38432-fig3-data1.xlsx]

## Sheet: Sheet1
ID	Cause of Death	Number Nematodes	cd3.muc	cd3.sub	cd3.mln	iba.muc	iba.sub	iba.mln	mast.cells	mucus	plasm.cells	plasm.cells.mln	blymph	blymph.mln	il4	il4.mln
329-12-N	Trauma	81	262	903	145	190	442	190	8	0.0557	98	89	71	56	45	102		HEB= hookworm enteritis and bacteremia
330-12-N	HEB	867	110	320	94	281	765	320	3	0.02736	65	78	76	60	41	52		mln=mesenteric lymph node
331-12-N	Trauma	101	323	651	180	270	430	210	10	0.055	61	96	45	49	67	110		sub= submucosa
332-12-N	Trauma	175	260	783	170	301	412	193	6	0.0426	110	94	68	67	63	123		muc= mucosa
333-12-N	Trauma	40	308	989	165	268	502	180	9	0.048	134	93	59	61	87	132		blymph=B lymphocytes
334-12-N	Trauma	120	291	620	142	214	473	230	10	0.0432	103	97	53	63	59	102		cd3= CD3 + lymphocytes
335-12-N	Trauma	59	220	702	136	265	412	280	11	0.04132	108	102	42	67	70	96		il4= Interleukin 4
336-12-N	HEB	486	171	420	101	275	513	410	4	0.039	69	81	77	44	33	34
337-12-N	HEB	397	148	394	102	243	492	380	2	0.02935	74	75	45	43	31	43
338-12-N	Trauma	230	262	732	149	275	455	230	12	0.03465	95	110	61	53	84	78
339-12-N	HEB	1528	85	125	94	220	941	349	4	0.034	71	71	61	35	27	41
69-13-N	HEB	270	136	298	91	210	610	421	6	0.028	72	63	62	56	29	36
70-13-N	Trauma	49	302	684	141	309	421	245	13	0.05321	91	112	47	58	93	93
73-13-N	Trauma	384	279	765	135	245	430	230	10	0.0378	105	98	68	49	69	107
74-13-N	HEB	430	146	276	107	244	590	433	3	0.029	69	69	61	41	31	54
75-13-N	Trauma	318	290	779	133	212	388	218	11	0.054	112	108	35	47	101	105
76-13-N	Trauma	436	211	652	158	231	399	212	9	0.0642	139	110	46	57	59	132
79-13-N	HEB	780	135	401	100	247	450	412	4	0.0315	81	78	54	47	41	33
80-13-N	HEB	561	129	387	110	301	570	401	5	0.0314	48	74	58	41	44	54
82-13-N	HEB	1108	101	346	91	250	620	389	4	0.0325	50	65	41	42	32	48
R15-553	Trauma	87	263	1020	169	321	380	198	8	0.0632	142	112	48	59	58	105
R15-555	Trauma	59	213	992	158	189	458	201	8	0.0456	112	107	59	64	47	104
R15-557	Trauma	47	201	615	151	269	460	243	9	0.0432	137	98	54	61	82	95
R15-558	HEB	739	116	378	94	226	802	342	6	0.041	62	76	43	39	26	44
R15-559	Trauma	16	197	560	134	233	401	238	11	0.047	149	106	53	43	86	89
R15-560	Trauma	459	250	820	143	274	380	212	7	0.0521	150	118	49	67	85	101
R15-562	HEB	1596	95	258	103	249	980	389	4	0.0293	67	69	75	36	23	41
R15-563	Trauma	78	362	558	126	338	498	228	8	0.034	98	124	64	49	43	132
R15-565	HEB	318	136	302	104	312	547	410	5	0.027	49	78	58	32	34	39
R15-566	HEB	989	94	145	93	297	1080	401	5	0.029	84	81	59	39	33	51
R15-567	HEB	564	132	216	94	221	541	429	4	0.037	61	64	69	33	36	23
R15-568	control	0	101	320	87	255	413	230	2	0.024	80	61	35	45	12	21
R15-569	control	0	128	354	71	203	392	210	3	0.022	84	56	26	41	8	21
R15-570	control	0	106	198	68	194	410	180	4	0.02345	95	63	47	43	9	24
R15-571	control	0	116	176	49	184	390	190	2	0.023654	87	64	35	40	10	26
R15-572	Trauma	102	191	539	127	230	450	220	9	0.060012	102	134	54	53	102	140
R15-550	HEB	2710	62	113	99	120	613	303	5	0.034	81	70	65	38	29	45
R15-552	HEB	1868	140	415	107	236	520	312	5	0.024	61	72	58	39	38	61
119-07	HEB	1280	78	128	98	256	620	402	4	0.0265	63	79	51	41	31	52
120-07	HEB	1340	65	120	103	241	940	329	5	0.0245	71	61	55	36	27	36
110-07	HEB	1598	150	380	102	280	498	378	3	0.02987	56	68	48	37	39	38
117-07	HEB	561	160	415	108	246	525	401	4	0.040256	71	72	49	31	41	31
253-08	HEB	1410	91	152	91	250	963	334	6	0.039	49	64	44	45	22	28
R17-345	control	0	101	220	71	210	396	205	4	0.0243	95	53	41	47	10	22
R17-346	control	0	108	245	60	199	405	189	3	0.0229	91	55	38	40	11	20
