# Supplementary material for: Immune-mediated hookworm clearance and survival of a marine mammal decrease with warmer ocean temperatures
Source: eLife. 2018 Nov 6;7:e38432. doi: 10.7554/eLife.38432 (PMC6245726; doi:10.7554/eLife.38432)
Supplement: Figure 4—source data 1. [file elife-38432-fig4-data1.xlsx]

## Sheet: Sheet1
ID	Sex	CD3	hw.eggs	Inf.period	Hb	Glucose	Cholesterol	lymphocytes	eos	basoph	GR	Nursing	BMI	Alb	Glo	Crea	IgG	Neut	Mac
29	female	7	1	22	9.8	5.5	8.1	1919	390	0	35.45	3	0.164474	45	28	45	1.98	4989	769		Legends
5	male	11	0	11	9.7	7.2	9.4	3124.6	95	96	32.5	2	0.112365	46	44	74	5.2	6320	850		CD3= CD3 + lymphocytes
6	male	53	2	16	16.8	7	6.3	2467.25	185.45	0	83.54	21	0.110959	39	31	56	16	8654	980		hw.eggs= number hookworm eggs in feces
8	female	32	1	15	11.7	8.6	7	2658.4	700	369	67.95	8	0.12	47	37	53	2.5	7120	1320		Inf.period= Infectious period
9	male	48	13	28	10.8	9.7	3.5	1433.6	1370	0	73.21	7	0.118987	44	32	70	11.3	6902	890		SBM = scaled body mass
10	male	61	12	30	11.1	9.1	3.4	3352.4	1027.4	340	98.45	16	0.122857	41	29	64	18.4	4911	643		Hb= Hemoglobin (g/dL)
12	female	55	12	11	12.3	11.1	5.4	3149	769.7	146.7	97.65	12	0.148101	41	31	49	5.8	5490	450		IgG= Parasite Specific Immunoglobulin G (arbitrary units)
15	male	9	0	13	10.2	4.3	8.3	1745.6	112.5	0	17.35	12	0.120214	44	40	54	2.1	5635	450		WBC= Total white blood cell count (cells/uL)
120	male	54	5	19	10	10	7.5	6123.5	423.6	689.5	83.6	10	0.13565	42	27	60	12.9	6402	880		Neut= Number neutrophils peripheral blood (cells/uL)
1	male	8	1	11	9.5	9	8.45	1650	830	0	35.78	2	0.135227	52	29	78	3.5	8952	670		Mon= Number monocytes peripheral blood (cells/uL)
4	male	51	13	21	8.1	10.4	3.5	4123.6	689	0	80.23	11	0.0791045	44	21	61	2.4	7623	1023		Lymph= Number lymphocytes in peripheral blood (cells/uL)
31	male	57	2	16	9.6	7.6	5.3	4488.65	523.85	774.9	94.65	8	0.129487	39	30	54	19	7933	722		Eos= Number of eosinophils in peripheral blood (cells/uL)
32	male	51	4	22	6.3	10.6	6.5	6837.2	1083.2	108.9	86.54	18	0.146479	48	35	63	7.4	5570	691		Baso= Number of basophils in peripheral blood (cells/uL)
34	female	39	1	22	13.8	9.2	8.4	3125	138.65	0	69.32	21	0.123077	41	30	61	41.2	5879	890		GR=Growth rate (grams per day)
41	male	9	1	17	12.4	6.9	7.8	2427.2	798.8	0	35.49	2	0.0849315	39	28	51	1	4980	904		Nursing = number of nursing events
44	male	22	7	35	11.3	10.6	5.95	1443.3	2285.6	0	63.25	6	0.125	45	23	59	3.8	4607	1541
46	male	16	3	31	13.2	11.4	6	2254.3	511.25	0	54.45	5	0.132432	44	31	52	1	5834	970
48	female	2	1	18	11.3	2.3	5.9	1854	350	0	18.35	2	0.142353	41	39	61	2	5345	1020
49	male	8	1	19	9.7	5.8	5.1	4688	528.8	0	20.14	3	0.111494	40	31	44	1	5108	980
50	male	17	26	35	11.2	8.4	7.3	12125.4	1524	12.5	54.1	5	0.11235	41	35	62	4.8	6120	710
51	male	75	38	21	11.1	12.1	4.4	5213.4	1912.5	0	81.4	6	0.12547	32	47	58	10.8	5234	970
52	male	66	0	8	12	9.1	4.7	5987.4	685.4	913.65	78.9	12	0.103265	40	50	57	7.9	5780	502
53	male	46	2	13	10.3	9.3	3	4121.5	612.3	0	71	11	0.080214	51	48	76	34.5	6345	690
54	male	50	5	18	10.1	10.3	7.7	6330.2	466.7	746.1	81.23	10	0.14086	41	28	61	12.9	6500	980
154	male	11	4	29	11.4	6..1	6.1	2312.5	712.5	0	34.65	11	0.12365	40	34	41	2.1	5102	970
155	female	51	3	12	10.8	11.5	4.05	3906.8	1030	737.1	91.65	9	0.114634	43	32	51	4.6	10652	1042
55	male	22	3	14	11.1	8.4	6.7	1745.5	213.6	0	61.35	12	0.13025	41	32	74	1.1	5560	620
56	male	13	3	28	9.8	9.9	4.6	3854.6	2734.7	0	42.95	6	0.126582	45	34	53	3.7	5400	1242
61	male	40	1	13	12	9.4	4.7	7569.8	800	0	72.35	8	0.0849315	38	31	56	12.6	5490	1010
95	male	46	13	28	10.8	9.6	3.8	1745.6	1236.5	0	71.2	7	0.11256	48	32	70	11.3	7023	780
98	female	14	2	20	11.2	8.2	6.1	3406.2	2285.6	0	52.15	4	0.09	48	27	51	1.9	5780	1090
158	female	12	0	12	11.3	6.2	5.4	2548.4	1345.6	0	38.4	4	0.102548	44	35	51	3.9	6230	542
84	male	12	4	45	10.5	8.1	4.6	3350.3	1684.4	0	49.05	15	0.0986486	47	36	69	0	5340	790
69	male	41	1	9	13.9	9.8	6.1	742.4	953	0	72.35	5	0.116456	41	31	51	1	4900	745
71	female	11	23	46	11.3	6.4	8.3	5331.5	500	0	38.35	2	0.106944	45	37	43	4.2	6120	890
72	male	61	27	30	11.8	11.8	4.3	9745.6	509	139	76.75	9	0.170313	44	28	58	18.4	6210	1201
73	male	6	0	10	10.5	9.7	4	4237.55	1013.9	0	18.85	2	0.0985507	40	32	43	0.5	6789	980
74	female	10	1	12	9.7	6.1	7.1	3979.25	466.25	83.25	39.54	3	0.101449	38	35	51	1	6456	1234
79	male	13	5	33	12	8.3	5	2988.8	285.4	0	52.6	14	0.118421	35	48	22	2.2	4780	890
82	female	8	1	13	6.7	7.1	7.4	3255.2	259.7	314.55	31.25	1	0.1	40	22	67	0.56	5890	1201
86	female	14	15	30	11.8	8.4	3.5	2298.5	487.85	0	54.35	5	0.115584	41	40	73	1.5	5109	812
89	female	8	2	21	10.1	9.6	6.2	2744	390	0	37.35	5	0.1375	44	29	37	1.5	6120	907
91	female	37	3	18	11.5	8.6	6.8	2984.5	650	321	61.2	8	0.115	46	37	54	2.4	6300	1345
90	female	37	3	16	11.8	9.1	6.4	3124	623.5	265	64.3	8	0.12456	48	38	50	2.1	6510	1354
93	female	24	15	25	8.8	8.9	6.4	1236.5	1030	245.7	67.65	4	0.117105	43	29	49	9.8	6231	980
99	male	63	11	30	11.2	8.9	3.4	3215.4	942.56	310	99.1	16	0.13654	42	29	61	14.5	5102	743
101	female	55	4	10	13.6	8.7	3.9	5699	382.1	833.4	91.68	12	0.116883	41	40	45	22.2	5239	980
103	male	9	1	11	10.2	4.6	8.1	1747	170	0	20.25	11	0.123457	46	43	60	2.4	5648	430
107	male	16	6	34	13.1	11.4	5.7	2546.8	461.25	0	51.4	6	0.13654	44	30	50	1.2	5120	870
110	male	51	23	22	12.8	10.2	5.8	5654	908.6	320	71.36	12	0.118667	43	20	63	7.8	5423	680
112	female	14	14	56	13.8	8.7	9.7	2998.2	375.35	0	60.35	4	0.140244	40	27	62	4.9	4980	810
113	male	67	25	23	10	12.3	6.1	6875	2033	0	66.65	11	0.101351	43	29	59	25.1	6100	930
114	male	16	6	35	13.2	8.35	4.3	3447.8	1200.2	0	52.75	3	0.0863014	41	31	42	63.45	6230	970
102	male	72	35	22	11.2	12.7	4.7	4986	2030	0	86.55	5	0.135897	32	45	57	10.8	5430	870
108	male	55	4	24	6.4	10.2	6.1	6754.6	936.5	102.3	83.4	18	0.13564	47	37	64	7.1	5402	720
121	male	9	1	11	9.8	7.3	9.3	3568	148.1	96	38.35	2	0.118841	44	42	77	3.9	6450	790
132	female	61	1	10	12.1	9.6	4.7	5987	835.7	948.15	81.45	11	0.107595	39	51	57	7.8	5924	450
134	male	12	7	24	13.7	8.05	7.1	2611.7	453.2	0	46.85	2	0.103947	49	32	47	1	5678	783
136	male	42	2	13	10.1	9.9	3.3	3789.4	683.6	0	71.23	12	0.0823529	53	45	73	31.2	6123	630
139	male	11	4	30	11.9	6.6	6.1	2350.32	787.1	0	38.45	12	0.138961	40	33	42	2.4	4908	871
141	male	20	1	14	11.2	8.8	7.2	1443.3	288.5	0	66.32	11	0.131579	48	32	75	2.6	5321	510
142	female	10	2	12	11	7	5.2	2456.9	1262.75	0	41.32	3	0.109412	42	35	53	3.9	6201	450
144	male	8	0	16	9.8	5.4	5.8	4523.6	412.3	0	18.5	3	0.10365	39	32	40	3.1	5108	890
145	male	2	0	17	11	2.5	5.6	1985.4	302.1	0	17	3	0.13654	40	38	64	0	6023	1030
146	male	9	0	19	12.4	6.5	7.1	2745.8	712.3	0	31.24	1	0.08965	38	25	61	0	5364	850
55	female	14	4	42	10.6	7.4	4.1	3365.44	1542.3	0	19.2	15	0.095864	45	35	67	1.2	5123	690
67	female	59	5	10	12.1	11	4.8	9142.2	154.7	1023.6	98	11	0.11256	38	31	44	40.2	6023	880
62	female	50	1	13	11.3	10.2	5.5	5896.4	1283	286.2	79.65	11	0.114815	44	32	40	20.3	6855	1410
63	male	45	2	16	9.8	10.1	3.4	6125.4	2786	492.75	75.25	7	0.115854	48	29	34	11.1	5901	659
64	female	55	5	10	12.8	11.4	5	9125.4	216.5	1199.5	101.32	11	0.118056	39	32	41	40.21	6301	870
68	female	40	2	8	10.7	9.6	4.9	3103.3	704.75	320	72.25	10	0.132927	42	35	67	3.9	5980	698
27	male	11	4	23	11.4	7.7	6.5	5132.5	1929.2	95	40.23	4	0.129268	37	34	38	13.5	6340	980
28	male	10	4	27	10.4	7.35	6.2	3384	1238.96	0	42.95	4	0.102817	39	32	52	10.6	6001	1001
115	male	50	13	23	9.5	10.2	4.4	3657.05	1542.2	855	78.65	5	0.132927	45	29	71	11.8	6230	750
119	female	16	23	38	11.1	8.75	7.1	13125.4	1684.4	0	60.65	6	0.101449	42	30	68	5.8	5980	650
