# Supplementary material for: Immune-mediated hookworm clearance and survival of a marine mammal decrease with warmer ocean temperatures
Source: eLife. 2018 Nov 6;7:e38432. doi: 10.7554/eLife.38432 (PMC6245726; doi:10.7554/eLife.38432)
Supplement: Figure 4—source data 2. [file elife-38432-fig4-data2.xlsx]

## Sheet: Sheet1
ID	Sex	pha_group	CD3	hw.eggs	Inf.period	Growth.rate	attendance	SBM	Hg	Glucose (mmol/L)	Cholesterol (mmol/L)	Albumin (g/L)	Globulins (g/L)	Creatinine (mmol/L)	IgG	Neut	Mon	Lymph	Eos	Baso
85	male	lowresp	9	0	9	35.4	4.44444	0.135227	9.5	8.8	8.35	53.5	28.5	79.5	3.5	8737.17	607.95	1750	780	0		Legends
89	male	highresp	53	12	23	80.256	20.3226	0.0791045	8.1	10.35	3.4	45	21	62.5	2.34489	7545.17	1070.31	4198.95	639	0		CD3= Number of CD3 + lymphocytes in skin biopsies
90	male	highresp	54	2	15	83.6	50.7692	0.110959	16.8	6.8	6.2	41.5	34.5	57.5	14.3311	8094.54	1190.34	2567.25	135.45	0		hw.eggs= number hookworm eggs in feces
91	female	highresp	36	2	17	65.6	12.8571	0.12	11.7	8.75	6.9	47	38.5	53	1.66826	6872.32	1228.46	2925.45	650	369		Inf.period= Infectious period
95	male	highresp	45	12	29	73	28.125	0.118987	10.8	9.73333	3.4	48.25	32	69.5	10.3	6655.61	802.093	1533.6	1320	0		SBM = scaled body mass
99	male	highresp	62	14	31	98.6	36	0.122857	11.1	8.9	3.3	41	29	64	16.9	4911	643	3452.4	977.4	340		Hg= Hemoglobin (g/dL)
108	male	highresp	54	3	23	84	45	0.146479	6.3	10.4	6.4	48	36.5	63	7.6	5570	691	6937.2	1033.2	108.9		IgG= Parasite Specific Immunoglobulin G (arbitrary units)
119	male	highresp	53	6	19	81	24	0.14086	10.1	10.1	7.6	41	28	61	12.1	6500	980	6430.2	416.7	746.1		Neut= Number neutrophils peripheral blood (cells/uL)
125	female	highresp	52	1	12	79.3	25	0.114815	11.3	10	5.4	44	31.5	40	18.3	6855	1410	6102.3	1233	286.2		Mon= Number monocytes peripheral blood (cells/uL)
131	male	highresp	56	1	15	95	20.3571	0.129487	9.6	7.4	5.2	39	30	54	18	7933	722	4588.65	473.85	774.9		Lymph= Number lymphocytes in peripheral blood (cells/uL)
133	male	lowresp	21	6	34	64.4	12.8571	0.125	11.3	10.4	5.85	44.5	21.5	59	4.1	4607	1541	1543.3	2235.6	0		Eos= Number of eosinophils in peripheral blood (cells/uL)
139	female	highresp	58	3	11	98.1	23.5714	0.114634	10.8	11.3	3.95	43	31.3333	49.6667	4.5	10652	1042	4006.8	980	737.1		Baso= Number of basophils in peripheral blood (cells/uL)
152	male	lowresp	12	4	28	41.6	16.875	0.126582	9.8	9.7	4.5	45	34	53	3.4	5400	1242	3839.4	2684.7	0		Attendance = number of nursing events corrected by total number of observations
162	female	highresp	57	12	10	96.8	27	0.148101	12.3	10.9	5.6	41	31	49	5.6	5490	450	3249	719.7	146.7
165	male	lowresp	14	1	21	50.8	9.375	0.09	11.2	8	5.9	48	27	51	1.2	5780	1090	3506.2	2235.6	0
168	female	highresp	54	3	9	90.33	27	0.116883	13.6	8.5	3.7	41	40	45	21.2	5239	980	5937.5	332.1	833.4
177	female	lowresp	10	24	45	37	6.66666	0.106944	11.3	6.2	8.2	45	37	43	3.2	6120	890	5431.5	450	0
186	male	highresp	62	30	31	75.4	26.88	0.170313	11.8	11.6	4.2	44	28	58	17.4	6210	1201	10040	459	139
187	male	lowresp	7	0	9	17.5	6.77418	0.0985507	10.5	9.5	3.9	40	32	43	0	6789	980	4337.55	963.9	0
192	female	lowresp	9	0	10	36	8.57142	0.101449	9.7	5.9	7.3	38	35	51	0	6456	1234	4079.25	416.25	83.25
P54	female	lowresp	14	6	32	51.25	28.125	0.118421	12	8.1	4.9	35	48	22	1.2	4780	890	3088.8	235.4	0
P55	female	lowresp	13	3	44	47.7	24.375	0.0986486	10.5	7.9	4.5	47	36	69	0	5340	790	3450.3	1634.4	0
P56	male	lowresp	15	17	29	53	10.5882	0.115584	11.8	8.2	3.5	41	40	73	0.5	5109	812	2398.5	437.85	0
P57	female	lowresp	8	0	12	29	3.6	0.1	6.7	6.9	7.3	40	22	67	0	5890	1201	3355.2	209.7	314.55
P58	female	lowresp	9	1	19	36	8.82354	0.1375	10.1	9.4	6.1	44	29	37	0.5	6120	907	2844	340	0
P59	female	highresp	25	14	24	65.3	11.5384	0.117105	8.8	8.7	6.3	43	29	49	9	6231	980	1239.4	980	245.7
P65	male	highresp	46	1	15	73.9	12.8571	0.115854	9.8	9.95	3.3	48	29	34	12.1	5901	659	6384.2	2736	492.75
P66	female	highresp	43	1	12	71	16.579	0.0849315	12	9.7	4.55	38	31	56	12	5490	1010	7920	750	0
P67	female	highresp	58	6	9	101	22.8572	0.118056	12.8	11.5	4.9	39	32	41	41.1	6301	870	9390	166.5	1199.5
P68	female	highresp	41	3	7	70.9	18.4615	0.132927	10.7	9.3	4.8	42	35	67	3	5980	698	3203.3	654.75	320
P69	male	highresp	42	0	8	71	11.6129	0.116456	13.9	9.6	6	41	31	51	0	4900	745	842.4	903	0
P70	male	highresp	54	16	11	91.2	36.3158	0.101449	8.1	6.5	5.65	40	29	39	32.6	4980	798	3956.4	733.5	147.6
P71	male	lowresp	8	0	21	34.1	5.1	0.164474	9.8	5.6	8	45	28	45	1.2	4989	769	2019	340	0
P73	male	lowresp	10	2	24	38.2	7.5	0.129268	11.4	7.5	6.35	37	34	38	11.2178	6340	980	5232.5	1879.2	95
P74	male	lowresp	11	4	26	41.6	8.46153	0.102817	10.4	7.15	6.1	39	32	52	9.57781	6001	1001	3484	1188.96	0
P75	female	highresp	40	0	21	69.123	50.7692	0.123077	13.8	9	8.3	41	30	61	40.0576	5879	890	3011.85	88.65	0
P76	male	lowresp	15	4	35	53.1	11.25	0.132432	13.2	11.2	5.9	44	31	52	0	5834	970	2354.3	461.25	0
P77	male	lowresp	1	0	16	17	4.61538	0.142353	11.3	2.1	5.8	41	39	61	0	5345	1020	2000	300	0
P78	male	lowresp	7	0	17	18	5.76924	0.111494	9.7	5.6	5	40	31	44	0	5108	980	4788	478.8	0
P79	male	lowresp	8	0	18	34.14	4.5	0.0849315	12.4	6.7	7.7	39	28	51	0	4980	904	2527.2	748.8	0
PHA_15	male	lowresp	8	0	12	18.9	4.61538	0.123457	10.2	4.4	8.13333	46	43	60	2.3	5784.82	426.35	1847	120	0
PHA_19	male	highresp	50	22	21	73.9	18	0.118667	12.8	10	5.7	43	20	63	7.2	5552.44	671.4	6014.25	858.6	320
PHA_41.16`	female	lowresp	15	12	55	59	9.375	0.140244	13.8	8.5	9.6	40	27	62	4.5	4980	810	3098.2	325.35	0
PHA_48.16	female	highresp	68	23	22	65.3	28.59	0.101351	10	12.1	6.4	43	29	59	24.8729	6100	930	7109.34	1983	0
PHA_49.16	male	lowresp	15	5	34	51.4	8.82354	0.0863014	13.2	8.15	4.1	41	31	42	63.8313	6230	970	3547.8	1150.2	0
PHA_50	male	highresp	51	14	22	75	11.25	0.132927	9.5	10	4.5	45	29	71	11.1551	6113.36	766.788	3757.05	1492.2	855
PHA_50.16	male	lowresp	17	25	39	59.3	14.2105	0.101449	11.1	8.55	7.55	42	30	68	5.1	5980	650	13833	1634.4	0
PHA_51	male	lowresp	10	0	10	37	3.65853	0.118841	9.8	7.1	9.3	45.3333	42	77	3.74821	6364.12	807.062	3924	98.1	96
PHA_51.16	male	highresp	74	40	21	85.2	19.5	0.135897	11.2	12.5	4.63333	32	45	57	9.8	5430	870	5134.5	1980	0
PHA_52	female	highresp	65	0	9	80.1	26.16	0.107595	12.1	9.4	4.85	39	51	57	7.14622	5824.57	474.188	6199.2	785.7	948.15
PHA_52.16	male	lowresp	12	6	25	45.5	5.625	0.103947	13.7	7.85	7.3	49	32	47	0	5678	783	2711.7	403.2	0
PHA_53	male	highresp	45	1	12	72	26.6667	0.0823529	10.1	9.7	3.1	53	45	73	29.4446	6287.12	653.587	3900.15	633.6	0
PHA_53.16	male	lowresp	10	5	31	37.1	24	0.138961	11.9	6.4	6.3	40	33	42	2.3	4908	871	2450.32	737.1	0
PHA_56	male	highresp	21	2	13	64	20.8696	0.131579	11.2	8.6	7	47.6667	31.6667	77.6667	2.1	5242.95	548.888	1543.3	238.5	0
PHA_82	female	lowresp	11	0	11	39.2	5.625	0.109412	11	6.8	5	42	33.6667	52.6667	3.2	5947.67	482.475	2646	1212.75	0
