# Supplementary material for: Immune-mediated hookworm clearance and survival of a marine mammal decrease with warmer ocean temperatures
Source: eLife. 2018 Nov 6;7:e38432. doi: 10.7554/eLife.38432 (PMC6245726; doi:10.7554/eLife.38432)
Supplement: Figure 5—source data 1. [file elife-38432-fig5-data1.xlsx]

## Sheet: Foraging trip length (hours)
	2007	2017
	24.3	32.6
	50	40.6
	34.8	38.7
	24	31.5
	18.4	37.5
	25.7	36
	17.6	56
	21.8	52.9
	27	36.1
	29.1	29.3
	21.2	31.5
	27.6	47.8
	29	42.2
	30.4	37.4
	26.8	28.5
	25.4	37.5
	27.3	26.2
	31.4	42.2
	20.8	39.1
	27.8	35.5
	28.3	33.5
	24.8
	25

## Sheet: Growth Rate (grams per day )
2007	2017
53.1	53.1
73.9	73.9
105.4	105.4
17.5	12
81	17.5
83.6	81
75	83.6
38.2	75
65.6	38.2
71	65.6
100	71
34.1	31
73.9	34.1
37	73.9
67.9	37
41.6	67.9
98.1	41.6
70.9	98.1
123	70.9
101.7	123
47.7	21.2
29	45
41.6	29.8
35.4	47.7
65.3	29
68.1	41.6
101	35.4
59.3	65.3
104	68.1
79.3	23
53	39
91.2	59.3
39.2	104
51.25	79.3
90.33	53
36	91.2
34.14	39.2
69.123	51.25
64.4	90.33
59	36
17	34.14
	69.123
	64.4
	72.2
	59
	17
	23
	6.32
	5
	19
	12.3
	10.2
	11.5
	9.1

## Sheet: Number nursing events
2007	2017
3.8889	11.25
3.94737	12.8571
4.09092	7.64706
4.09092	7.10526
4.11765	20.3571
4.36365	8.82354
4.44444	6.66666
4.54545	6.77418
4.61538	12.8571
4.6875	8.57142
5.00001	5.35713
5.00001	6.34614
5.10639	11.25
5.17242	7.5
5.21739	17.6923
5.29413	12.8571
5.29413	7.2
5.33334	7.94118
5.52633	11.6129
5.55555	20.3226
5.58141	8.33334
5.625	7.67442
5.74467	18
5.85366	3.65853
6	6.66666
6.11112	9.70587
6.12246	8.46153
6.17646	23.5714
27.8571	18.4615
13.5714	9.99999
6.54546	17.4194
15.9375	8.33334
6.66666	26.6667
6.66666	7.05882
23.3333	13.6364
20.4545	7.05882
6.92307	14.5454
6.97674	4.61538
7.05882	14.5454
7.10526	15.7143
7.14285	16.579
7.1739	4.8
7.24137	8.75001
7.31706	6.81819
7.5	24.375
7.5	3.6
7.5	16.875
7.5	15
7.60563	4.44444
7.70271	18.4615
7.71429	11.5384
7.71429	5.76924
7.8261	2.85714
7.8261	22.5
7.8261	0
7.85715	14.2105
7.89474	0
8.1081	25
8.12499	10.5882
8.25	0
8.27586	5.625
8.46153	28.125
8.57142	20.8696
8.57142	8.82354
8.70969	9.375
8.82354	0
8.86365	24
8.88888	20.3571
9	9.375
9.06978	4.61538
9.13044	4.61538
9.23076	3.75
9.23076	2.30769
9.28572	1.25001
9.28572	1.93548
9.33333	2.49999
9.33333	2.49999
9.33333	2.72727
9.375
9.375
9.375
9.375
9.44445
9.70587
9.72972
9.75
9.99999
9.99999
9.99999
9.99999
9.99999
9.99999
9.99999
9.99999
10.3448
10.3448
10.3846
10.3846
23.4783
23.4783
25.5
10.5882
10.6452
10.7547
24.5455
38.1818
11.0869
11.1628
23.75
11.3333
11.4706
11.6129
12
12.1875
12.3077
12.5807
12.6316
28.421
12.8571
12.8571
13.2558
13.3333
13.3333
13.5714
13.75
13.7838
14.2105
14.4
14.5454
14.5946
15
15
15.4286
15.75
15.8824
16.875
17.5
18
18.3333
18.75
18.75
19.2857
19.6552
20
20
20
20
20.7692
21.1111
21.1364
21.4286
21.6667
22
22.1053
22.5
22.5
24.2857
24.375
25.3846
26.25
26.25
26.25
27.6923
30
30
30
30
30
33.75
36
36.4286
52.5
