# Supplementary material for: Immune-mediated hookworm clearance and survival of a marine mammal decrease with warmer ocean temperatures
Source: eLife. 2018 Nov 6;7:e38432. doi: 10.7554/eLife.38432 (PMC6245726; doi:10.7554/eLife.38432)
Supplement: Figure 5—source data 2. [file elife-38432-fig5-data2.xlsx]

## Sheet: IgG
2012	2013	2014	2015	2016	2017
38.5	6.3	4.2	100	11.391	28.4066		Measurement unit= Arbitrary units
1.2	9.2	1.1	14.2	12.01	6.84986
4.4	39	3.2	14.9	11.418	2.01635
3.5	17.3	7.5	9.5	17.905	7.33825
1	39.7	2.5	14.1	20.241	63.71
7	16.3	2.2	4.1	4.2089	2.36749
20.5	0	3.8	10.5	19.967	63.71
8.7	16.1	2.2	0.3963	37.575	30.893
2.4	27	2.1	39.656	98.25	5.03609
3.2	34.2	1.9	0.9901	3.4	3.96119
16.1	6.8	2.2	0	13	5.93949
29.2	17.6	0.6	1.2659	24.9	9.06332
5.9	6.5	2.1	1.4505	63.8	19.1205
21.4	22	2.9	45.065	9	9.93504
9	17	3.2	13.818	11.2	4.13964
10.3	4.7	1.8	15.874	9.6	17.0624
18.6	5.7	1.1	22.31	40.1	13.4189
26.6	3.5	1.7	6.4856	2	4.25877
30.2	9.2	1.6	7.8439	3	8.3827
8.5	35	4.1	7.717	5	17.1283
5.7	9.1	1.2	4.5226	4	58.9616
4.9	10.3	7	33.266	6	14.1915
7.4	13	3.1	2.4042	7	18.3869
9.3	10.5	2.6	6.3861	3	1.95794
16.3	11	3	6	2	6.9108
18.7	11.4	2.3	25	4	15.4891
7.2	10.1	1.6	26	7	6.9108
31.4	8.3	0	32	3.25	6.36346
7	9.5	2.4		3.4569	19.1205
1.3	15.5	3		4.215	4.43769
35	18.7	0			5.81863
1.1	2.3	0.1			4.7365
11.3	3.5	0			6.48487
3.8	13.6	0			2.77853
1.5	7.5	2.9			41.2434
3.3	7.6	0			2.19178
6.8	9.6	8.4			2.19178
7.9	5.6	2.3			4.25877
2.4	2.8	6			3.48665
11	23.8	1			8.3827
18.1	26.6	6.1			69.7755
2.3	91	0.4			6.67121
2.8	49.3	0			2.36452
3.9	6.3	1.6			0.816543
2	14.8	17.9			1.42352
1.8	18.4	1.4			9.33526
4.9	16.6	0.6			2.19821
6.3	0.7	4			8.53895
8.5	126.3	33.7			5.48948
5.5	4.4	3.2			6.61482
1.5	17.3	2.7			3.5876
8.3	120	2.8			1.53404
2.5	65	9.3			4.14551
5.1	65	8.9			7.68836
16.4	64	0.4			12.3132
1.7	61	10.5			2.75304
5.9	45	16.6			2.41999
11	78	14.7			26.0253
3.4	79	5.3			21.6083
32.9	53	8.5			10.3053
8.1		4.3			2.6975
6.9		11.3			11.9105
		0			5.6018
		5.8			34.2759
		9.1			4.48084
		0			12.9472
		4			22.8562
		4			9.16443
		1.1			9.73429
		3.5			7.85826
		0			12.7165
		8.7			6.72762
		30.5			23.2136
		8.2			100
		3.4			16.3711
		14.4			28.0122
		7.9			29.4029
		12.8			21.3712
		7.7			24.1684
		9.9			4.53677
		35.7			12.118
		11.2			8.6106
		3.8			10.329
		15.5			23.511
		8.5			28.25
		15.8			30.211
		7.1			32.581
		3.6			25.645
		19.3			42.705
		4.6			9.1007
		7.4			0.2147
		4.5			7.4639
		3.2			11.177
		5			12.2
		8.9
		4.4
		20.4
		3.8
		28.7
		0.9
		5.6
		1.7
		1.3
		0
		44.7
		10.9
		17
		3
		4

## Sheet: Lymphocytes
2012	2013	2014	2015	2016	2017
2.6838	1.652	0	6.0382	2.29905	5.1597
1.0017	8.075			2.5272	2.8791		Measurement unit= cells x 1000 /uL
0.52425	2.9325	0	3.04722	6.8805	2.0601
1.0611	3.91	5.292	2.72349	3.9564	1.863
1.458	2.268	1.742		4.0068	1.73745
2.754	5.704			6.1992	1.4256
2.916	2.07			2.56725	0.7925
3.78	2.688	0.504		1.71817
1.215	4.9			3.44925	2.106
1.5246	4.2			4.63725	2.0475
5.0553	5.616		2.99574	3.5532	1.15335
2.4786	5.04	0.336	5.2965	2.5992	1.3473
5.4756	3.168			4.07925	2.6838
6.3	4	3.5	2.80962	2.9808	1.0017
2.9403	2.604	1.34		2.46645	0.52425
4.4811	2.464	1.392	4.77043	4.97025	1.0611
4.6809	2.43		2.71656	6.5637	1.458
1.287	2.266	2.352	2.39085	2.754	2.754
3.9933	7.912	4.732	5.61348	2.916	2.916
1.14075	4.536	0	3.91608	3.78	3.78
	3.35	0	1.77612	1.215	1.215
	10.384	5.85	0.9801	1.5246	1.5246
8.019	11.692		3.20866	5.0553	5.0553
6.2244	9.24	3.654	2.25225	2.4786	2.4786
3.726	5.04			5.4756	5.4756
3.44655	2.256	0	2.95218	6.3	6.3
1.4796		2.628		2.0979	2.0979
3.67875	3.652	1.68	2.73546	3.96	3.96
4.4694	6.96	1.728	2.00772	2.7594	2.7594
3.9852			7.5256	3.61215	3.61215
	3.12		2.831
	3.564		3.89823	1.62	1.62
	7.676		3.29676	2.9403	2.9403
		10.048		4.4811	4.4811
			5.30154	4.6809	4.6809
		1.316	5.32	1.287	1.287
		7.5	5.20344	3.9933	3.9933
	4.914			1.14075	1.14075
	1.848		3.0988
	8.784	1.428	5.15889
	3.36		2.178	8.019	8.019
	5.004		10.25	6.2244	6.2244
	3.348		3.69427	3.726	3.726
	4.8		3.88436	3.44655	3.44655
	8.662	3.816	2.19186	1.4796	1.4796
	5.44		5.46777	3.67875	3.67875
	2.4		5.11893	4.4694	4.4694
	5.328	1.728	2.5023	3.9852	3.9852
	8.025		3.39927
	7.48	2.88	3.76855	2.3472	2.3472
	4.48	5.016	0.39106	1.9836	1.9836
	7.344	5.562	5.58657	5.27625	5.27625
	4.95	0	0.6633	4.14	4.14
	5.2145		5.14016	2.24775	2.24775
	4.698		2.90326
	6.552	5.488	3.14622	2.9808	2.9808
	5.424			1.3689	1.3689
	3.344		2.67102
	6.72		2.40669	3.00375	3.00375
	6.18		7.734	3.4398	3.4398
	4.056		3.81208	4.8285	4.8285
	3.215		2.24334	2.9484	2.9484
	2.784	2.88	3.64428	6.33555	6.33555
	2.128	0	4.61409	4.2048	4.2048
	1.768		0.63162
	3.456	7.456	1.64544	3.6612	3.6612
	3.024	5.146	1.88947	3.132	3.132
	1.584		2.07904	5.1678	5.1678
	3.774		4.2365
				5.031	5.031
		0	4.9599	3.5496	3.5496
		0	9.16839	2.736	2.736
			4.26647	3.6936	3.6936
		1.224	3.39133	5.369	5.369
			6.79006	2.0925	2.0925
		4.1	3.5448	2.19375	2.19375
		1.62	8.4686	2.3472	2.3472
			8.03682	0.999	0.999
		0.9	2.6384	1.881	1.881
		2	3.4056	1.0044	1.0044
		0	2.73889	2.1735	2.1735
		0	6.08058	3.051	3.051
		0	2.24928	6.96	6.96
		3.136	6.71616	2.3985	2.3985
		3.108	1.1088	2.7126	2.7126
		8.154	3.4898	4.563	4.563
		2.256	2.95375	2.196	2.196
		0		1.215	1.215
		7.672		3.01185	3.01185
		0	4.49225	3.7944	3.7944
		5.44	0
		0	3.38877		4.212
		6.9	1.21968
		4.656	3.10365
		3.752	2.14292		11.0714
		4.158	2.16224		3.7467
		5.368
		1.42	5.54461		4.095
		5.336
		4.108
		4.524			3.285
					3.6855
		2.44			3.4272
		0			8.9262
		5.32			2.565
		8.924			5.5242
		4.992			5.47965
		5.984			2.3544
		7.59			1.9305
		9.73	6.1479		1.0476
		1.256			2.4336
		0	1.36224		2.6082
		0	5.3385		2.403
		0	1.6038		4.7655
		1.04	4.76289		4.5666
		2.13			1.9296
		0			11.6707
		5.632			2.3463
		0			2.8188
		3.1			5.3856
					0
		0			7.245
		6.384	3.14604		1.944
		2.52			4.2336
		3.8	2.58976		1.1304
		5.13	2.673		2.77965
		7.704	4.35984		2.8566
		3			4.9725
		2.376	2.8448		4.4226
					3.924
		2.28
		4.464			3.0555
		2.16			4.95
		2.688	7.38738		4.221
		2.448			3.17056
		3.696	1.36521
		3.888
		9.81	3.14325		5.24205
		7.622	6.30036		3.3948
		0	1.78094		3.5055
		4.482	3.0209		2.331
		2.24	5.61912		3.5154
		4.536	3.8115		3.5739
		9.048	9.9135		0.8424
		1.624	5.38825		5.1345
		2.76			3.9312
		0
		2.85			2.88
		6.656			6.01425
		7.968			2.9484
		3.344	5.2569		6.0102
		6.3			4.0851
		4.838	4.16592		3.249
		0
		9.792	4.90482
		0			3.4524
		5.544			4.19895
		4.2	3.54618		3.1185
		8.37			2.9988
		0	9.8156		2.5623
					5.508
		2.024			7.6302
		0
		2.44
		0
		5.254			3.6288
		4.416			10.4166
		9.5			5.0949
		7.808
		1.64			2.7027
		2.46			2.44755
		2.624
		0			3.0294
		7.176			1.35585
		3.5785
		3.276			3.888
		5.412			5.3793
		9.072
		3.276			4.33755
		0			6.5934
		6.111
		4.081			1.73655
		0			3.75705
		0			1.3392
		3.06
		0
		0			4.58865
		1.3526			1.5336
		7.562			4.788
		0			5.2325
		6.825
		0			2.29905
		5.548			2.5272
		3.075			6.8805
		0			3.9564
		5.452			4.0068
		8.364			6.1992
		3.276			2.56725
		0			1.71817
		4.48			3.44925
		2.86			4.63725
		0			3.5532
		0			2.5992
		2.812			4.07925
		1.56			2.9808
		8.748			2.46645
		0			4.97025
		0			6.5637
		2.66
		0
		0
		0			3.0447
		0			4.68585
		0			5.1381
		0			5.4
		9.635			2.78775
		0			4.3956
		5.016			3.69045
		5.72
		0			2.646
		6.278			19.3986
		0			2.9682
		0
		7.296			2.2572
		0			2.7117
		2.375			3.0888
					6.9372
					7.92
					3.1239
					5.8995
					3.9186
					3.9312
					4.86855
					5.5386
					5.1615
					2.3985
					2.3661
					7.5078
					4.2768
					3.09375
					2.60775
					2.754
					5.256
					5.0706
					2.95875
					2.4849
					3.7584
					3.393
					4.9572
					2.376
					3.5298
					2.6433
					3.7332
					10.6394
					2.80035
					4.0095
					8.09045
					5.47605
					3.0636
					2.5425
					3.8394
					1.2462
					3.5721
					2.0817
					2.8197
					5.1948
					3.0348
					5.4171
					3.9852
					7.2324
					5.20875
					3.16125
					4.725
					5.454
					5.1678
					3.90015
					3.3777
					2.37915
					2.92545
					5.90625
					2.9736
					2.934
					2.49824
					3.82725
					2.9007
					3.3552
					4.86675
					5.967
					6.7172
					3.5478
					3.70575
					3.16665
					6.2883
					8.23905
					5.4315
					4.6125
					5.1876
					3.2175
					6.624
					4.2255
					7.35165
					22.1697
					13.833
					5.0301
					7.6194
					2.3652

## Sheet: Basophils
2012	2013	2014	2015	2016	2017
0.1305	0	0	0	0	0.1413		unit of measurement = cells x 1000 / uL
0.5616	0			0
0.3249	0	0	0	0
0.1314	0	0	0	0.126	0
	0	0		0
0.7119	1.2			0.1089
0.26225	0.36			0	0
0.4698	0.254	0		0	0
	0.35			0.1404	0
	0.245	0.1		0.28
0	1.2	0.12	0	0	0
0	0.365	0	0	0.3168	0
0	0.245	0.101		0	0
0	0.365	0	0	0.3141
0	0.354	0		0
0	0.698	0	0	0.45
0	0		0	0.2673
0	1.03	0	0	0.3447	0
0.0999	0	0	0	0	0
0	0.324	0	0	0.099
0	0	0	0	0.2754
0	0	0	0	0	0
0	0	0	0		0
0	0	0	0		0
0	0.48	0		0.297	0
0.2	0	0	0	0.4914	0
0.1755	0	0		0.1242	0
0.13725	0.35	0	0	0.2997	0
0	0.26	0	0	0.3699
0	0.214	0	0	0.8829	0
0	0.215	0	0	0.3438	0
	0.147	0	0	0.2214	0
	0.014	0	0	0	0
0.134	0.365	0.102		0.7335	0
	0.25	0.302	0	0.2088	0
	0.254	0.12	0	0.15075	0
	0.84	0	0	0.1035	0
0.175	0.22	0		0.14985	0
0.1258	0.125	0	0		0
0	0.23	0	0	0	0
0.4875	0.336		0	0	0.126
0	0	0	0		0
0	0		0	0	0.1089
0	0	0	0	0.2457	0
0	0.25		0	0.1305	0
0	0.245		0	0.5616	0.1404
0	0.365	0	0	0.3249	0.28
0	0.365	0	0	0.1314	0
0	0.75	0	0		0.3168
0	0	0	0	0.7119	0
0	0	0	0.12	0.66	0.3141
0	0	0	0.35	0.4698	0
0	0		0.45		0.45
0	0	0			0.2673
0	0	0		0	0.3447
0	0.168	0	0.203	0	0
0	0			0	0.099
0	0	0	0.12	0	0.2754
	0.87		0.235	0	0
	0	0	0.362	0
	0.251	0	0.214	0
	0.38	0	0.297	0	0.297
	0		0.4914	0.0999	0.4914
	0.152	0	0.1242	0	0.1242
	0	0	0.2997	0	0.2997
	0	0	0.3699	0	0.3699
	0	0	0.8829	0	0.8829
	0.152		0.3438	0	0.3438
	0.365		0.2214	0	0.2214
	0.214		0	0.7398	0
	0.95	0	0.7335	0.1755	0.7335
	0.45	0	0.2088	0.13725	0.2088
	0.265		0.15075	0	0.15075
		0	0.1035	0	0.1035
			0.14985	0	0.14985
		0	0.3177
			0.1476		0
			0.27675	0.234	0
		0.29	0
			0.7938		0
			0.16245		0.2457
			0.7371	0.3753	0.1305
			0.1467	0.3258	0.5616
			0.7371	0	0.3249
				0.7875	0.1314
			0.12
			0.13365		0.7119
		0.42	0.3276		2.6622
			0	0	0.4698
			0.12015	0
			0.855	0
				0	0
				0	0
				0	0
				0	0
					0
		0		0	0
		0		0	0
		0		0	0
		0		0	0.0999
		0		0	0
		0		0.36045	0
				0	0
		0		0	0
		0		0.1206	0
		0			0
		0			0.7398
		0			0.1755
					0.13725
					0
		0		0	0
				0.13035	0
		0		0
		0		0
		0			0.234
				0.414
				0
		0		0
				0	0.3753
		0		0	0.3258
				0	0
		0		0	0.7875
				0.1134
		0		0.1962	0
		0.68			0
		0		0.1746	0
				0	0
		0		0	0
		0		0.09908	0
		0			0
		0
		0		0.3177	0
		0		0.1476	0
				0.27675	0
		0		0	0
		0		0.7938	0
				0.16245	0.36045
				0.7371	0
		0		0.1467	0
				0.7371	0.1206
		0		0.12
		0		0.13365
				0.3276
				0
				0.12015	0
		0		0.855	0.13035
		0			0
					0
		0
		0		0	0.414
		0		0.94815	0
				0	0
		0		0.2142	0
		0		0.09855	0
				0	0
				0	0
		0			0.1134
		0
				0.0864	0.1962
				0
		0		0	0.1746
					0
				0.0819	0
				0	0.09908
				0.0594
				0.2358	0.3177
		0			0.1476
				0	0.27675
		0		0	0
		0			0.7938
					0.16245
		0			0.7371
					0.1467
				0	0.7371
		0		0
					0.12
		0		0	0.13365
				0.3267	0.3276
				0	0
					0.12015
					0.855
				0
				0.0639
				0
				0.299	0
					0.94815
				0.05895	0
				0	0.2142
				0	0.09855
				0.1413	0
				0.2862	0
				0.1476
				0
				0
				0	0.0864
				0	0
				0.10305	0
				0.1269
				0	0.0819
				0.08325	0
				0
				0	0.0594
				0	0.2358
				0
					0
					0
				0.08955
				0
				0
				0.16875	0
				0.39825	0
				0.18315
				0	0
					0.3267
				0	0
				0.7461
				0
					0
				0	0.0639
				0	0
				0	0.299
				0.5076
					0.05895
					0
					0
				0	0.1413
					0.2862
				0.36045	0.1476
				0	0
					0
				0.13995	0
					0
				0	0.10305
				0.15705	0.1269
				0.1629	0
				0	0.08325
				0.09225	0
				0	0
				0	0
				0	0
				0.2475
				1.098
				0	0.08955
				0	0
					0
				0	0.16875
				0.2367	0.39825
				0	0.18315
				0	0
				0
				0	0
				0	0.7461
				0.0954	0
				0.1602
				0.2196	0
				0.5751	0
					0
				0.8001	0.5076
				0.13365
					0
					0.36045
					0
					0.13995
					0
					0.15705
					0.1629
					0
					0.09225
					0
					0
					0
					0.2475
					1.098
					0
					0
					0
					0.2367
					0
					0
					0
					0
					0
					0.0954
					0.1602
					0.2196
					0.5751
					0.8001
					0.13365
					0.18815
					0
					0
					0.1017
					0
					0
					0
					0
					0
					0.2169
					0.5616
					0
					0.8334
					0.7749
					0.3528
					0.62505
					0.2529
					0.0945
					0
					0.14355
					0.2889
					0.18765
					0.41985
					0.3546
					0.675
					0.2124
					0.4401
					0.15614
					1.27575
					0.39555
					0.31455
					0.13905
					0.5265
					1.1995
					0.49275
					1.3725
					1.2258
					0.18495
					1.2924
					1.278
					0.738
					0.9432
					0.2925
					0.864
					0
					0.71145
					0.4347
					0
					1.1178
					0
					1.4454

## Sheet: Glucose
2012	2013	2014	2015	2016	2017
5	10.4	8.2	9.8	6.5	7.9		unit of measurement = mmol/L
2.3	11.2	6.3	6.3	9.1	9.6
6.7	13.7	6.3	6.4	7.2	10.4
5.2	10.7	7.9	4.7	4.8	11.2
4.7	12.8	7.4	4.6	5.7	7.1
9.7	15	8.5	4.9	5.4	8.1
9.3	11	8.8	6.2	6	13.7
9.6	10.5	6.4	5	7.4	6
8.6	8.5	4.7	2.3	6.4	11.5
12.8	10	4.6	6.7	4.5	10.7
8.6	13	4.9	5.2	7.2	9
7.3	9.8	4.3	4.7	6.1	9.7
6.8	15.2	6.5	1	6.9	9.3
8.5	12.3	7.2	7.9	6.4	9.6
9.7	13.4	6.4	4.6	12	8.6
9.7	12.5	5.2	5.5	4.8	12.8
9.3	11.2	4.7	15	5	8.6
9.6	9.8	1	5.7	5.1	7.3
8.6	6.8	7.9	4	5.8	6.8
9.8	7.8	4.6	6.6	6.8	11
8.6	9.5	5.5	9	6	9.7
7.3	9.8	2.5	9.7	5.1	11.1
6.8	10.6	5.4	9.3	8.1	9.4
10.9	10.7	6.2	9.6	5.2	9.2
10	10.9	5	8.6	3.8	9.5
8.2	10.4	2.3	12.8	3	12
9.23	10.6	6.7	8.6	4.1	9.4
9.1	10.2	5.2	7.3	2.4	10.1
10.5	11.23	7.8	6.8	9	9.9
8.5	14.5	6.4	11	9.7	8.5
10	9.8	5.4	9.7	9.3	8.2
8.7	6.4	4.9	11.1	9.6	9.3
10.4	13.4	6.2	12.1	8.6	9.9
11.3	8.4	5	9.2	12.8	9.7
8.7	6.7	2.3	9.5	8.6	10.9
8.4	9.8	6.7	12	7.3	10
8.9	15.4	3.6	9.4	6.8	8.2
8.9	14.5	4.5	9.8	11	9.23
5.9	12.5	5.6	9.9	9.7	11
9.1	11	7.9	8.5	10.2	10.5
9.8	10.4	4.6	8.2	9.4	8.5
6.5	9.7	5.5	9.3	9.2	10
4.5	9.6	7.5	7.5	9.5	10.2
6.5	9.4	6.4	6.5	12	5.5
6.2	11.1	5.2	6.8	9.4	6.7
4.5		4.7		10.1	7.6
5.7		1		9.9	10.4
				8.5	7.8
				8.2	8.1
				9.3	6.6
				7.8	7.5
				7.1	9.1
				4.5	8.1
					8.2
					12
					10.4
					11.3
					8.7
					11.9
					8.9
					8.9
					5.9
					9.7
					8.7
					6.8
					7.1
					7.1
					10
					8.3
					9.5
					10.5
					10.8
					8.2
					6.3
					6.3
					7.9
					7.4
					8.5
					8.8
					11.7
					7.3
					10.9
					9
					7.2
					6.5
					9.5
					8.7
					8.1
					9.1
					10
					8.4
					8
					8.1
					8.5
					7.6
					6.7
					7.6
					7.2
					8.5
					10.8
					10.8
					7.6

## Sheet: Cholesterol
2012	2013	2014	2015	2016	2017
5.5	8.2	2.1	3.1	3.7	5.5		unit of measurement = mmol/L
6.2	8.9	3.5	6.2	6.1	5.5
5	7.2	3.4	3.1	3.9	6.2
5.1	6.5	5.2	4.2	4.5	5
5.1	6.4	2.5	4.6	5.3	5.1
6	6.8	3.1	4.1	3.9	6
2.8	7.2	3.9	3.8	3.3	6
5.3	7.1	3.4	4	3.8	2.8
4.5	5.3	4.2	3.2	4	5.3
5.4	4.6	3.5	5.4	5.5	4.5
6.4	5	2.4	4.4	5.3	5.9
4.5	6.1	2.6	4.9	3.5	6.4
4.9	6.2	5.3	3.5	3.2	4.5
4.1	5.8	3.5	4.8	5.1	4.9
8	5.4	3.2	5.7	3.1	4.1
3.5	7.4	5.1	3.5	4.2	8
5.5	7.3	3.4	7	4.5	3.5
3.9	7.6	3.5	5.4	5	5.8
6.9	7.8	3.4	3	4.3	3.9
4.9	8.2	5.2	5.4	3.8	6.9
7.6	8.1	4.2	6.7	5.7	4.9
5.8	7.4	4.5	8.3	3.6	9.6
7.1	7.6	3.7	6.9	4.3	6
5	7.5	3.9	7.7	4.7	9.1
6.7	7.9	3.1	6	5.2	5
7.3	6.5	3.9	6.6	4.2	6.7
5.5	6.3	4.6	10.1	4.7	7.3
5.2	6.4	4.1	9	3.7	6.5
6.3	6.5	3.5	6.4	4.2	5.2
5.9	7.5	6.4	6.5	6.4	6.3
6	7.1	3.5	6.3	6.2	5.9
9.8	6.9		5.9	6.5	6
6.9	6.8		9.3	6.4	12.5
7.2	6.7		10.2	5.2	6.9
4.8	9.1		8.2	4.1	8.3
4.5	8.2		6.1	4.6	4.8
8.3	7.2		9.4	4.7	6.7
6.4	7.9		6.2	4.7	8.3
6.7	7.8		3.4		6.9
5.2	8.1		3.4		7.7
6.6	8.3				6
9.4					6.6
9					10.1
6.4					9
6.5					6.4
6.3					6.5
5.9					6.3
8.4					5.9
8.4					9.3
8.2					10.2
6.1					8.2
6.5					6.1
4.2					6.5
3.9					4.2
6.5					4.9
6.2					6.5
3					6.2
6.4					6
4.8					7.2
4.6					4.8
					4.6
					5
					3.1
					3.4
					3.3
					6.1
					5.6
					5.8
					4.5
					4.1
					4.9
					5.4
					7.3
					7.6
					7.6
					3.2
					2.9
					3.7
					3.8
					6.4
					3.7
					7.5
					3.8
					6.2
					4.9
					5.5
					6.1
					5.1
					3.7
					4.2
					4.1
					5.7
					3.3
					4.2
					5.5
					4.2
					4.6
					6.3
					6.5
					5.8
					4.1
					4
