# Supplementary material for: Immune-mediated hookworm clearance and survival of a marine mammal decrease with warmer ocean temperatures
Source: eLife. 2018 Nov 6;7:e38432. doi: 10.7554/eLife.38432 (PMC6245726; doi:10.7554/eLife.38432)
Supplement: Figure 6—source data 1. [file elife-38432-fig6-data1.xlsx]

## Sheet: Sheet1
Year	Jan					Feb					Mar					Oct					Nov					Dec
	NW	SW	E	W	mean	NW	SW	E	W	mean	NW	SW	E	W	mean	NW	SW	E	W	mean	NW	SW	E	W	mean	NW	SW	E	W	mean
2004																11.4	11.1	11.4	10.9	11.2	12.57	11.55	11.98	12.42	12.13	13.15	12.71	12.8	13.2	12.965		Guafo = 43,5°; 74,7°
2005	14.75	14.02	13.15	14.17	14.0225	15.48	14.9	14.02	16.5	15.225	15.2	13.9	13.3	15.5	14.475	10.82	10.82	10.7	11	10.835	12.13	12.28	11.7	12.4	12.1275	13.15	12.71	12.6	13.2	12.915
2006	15	14.8	14	15.2	14.75	15.5	15	13.2	17.4	15.275	14	14.2	13.2	15.3	14.175	11.6	11	11	10.4	11	12	11.4	11.6	11.1	11.525	12.7	12.1	12.3	12.3	12.35		NW = 43°; 75°
2007	13.9	13.3	13.4	13.6	13.55	14.6	14.3	13.6	15	14.375	14.6	14.2	12.7	15	14.125	10	10.5	10.2	9.5	10.05	11.6	11.1	11	11	11.175	12.9	12	11.6	13.4	12.475		SW = 44°; 75°
2008	15	14.5	12.6	15	14.275	15.6	15	13.9	16.5	15.25	16.1	15.8	13.4	17.2	15.625	11.6	11.4	11.1	11.7	11.45	13.4	12	12.3	11.6	12.325	14.5	13.7	14	13.9	14.025		E = 43,5°; 74°
2012	15.8	15.3	14.5	17	15.65	16.1	15	12.7	16.4	15.05	15.2	13.6	13.6	15.2	14.4	11.7	12.4	10.8	10.1	11.25	12.3	12.3	11.6	11.7	11.975	13.4	13	13	12.3	12.925		W = 43,5°; 76°
2013	11.6	14.2	13.7	15.2	13.675	15.6	15.2	12.9	16.4	15.025	14.3	13.4	12.6	15.5	13.95	10.5	10.4	10.4	11	10.575	11.8	11.3	11.3	12.1	11.625	14.6	14.5	12.7	15	14.2
2014	15.6	14.2	13.4	15	14.55	14.6	14	13.3	15	14.225	13.9	13.9	11.7	14.3	13.45	11.3	11.3	11.4	11.4	11.35	11.7	11.6	11.8	12.1	11.8	13.6	12.9	12.6	13.4	13.125
2015	15.2	14.2	13.2	14.6	14.3	15	15	13.2	15.5	14.675	14.8	14.5	13.2	15.2	14.425	11.3	10.7	11.1	11.6	11.175	12.9	12.1	12	12.4	12.35	15.3	13.3	12.4	13.4	13.6
2016	15.3	14.8	14.2	16.4	15.175	15.5	15.3	13.7	16.4	15.225	14	14.2	12.7	15.5	14.1	13	11.8	11.8	11.4	12	12.6	12.6	12.3	12.1	12.4	14	13.7	12.9	13.7	13.575
2017	15.8	15	13.6	16	15.1	16.4	15.2	13.9	16.2	15.425	15	14	13	15.3	14.325
