# Supplementary material for: Immune-mediated hookworm clearance and survival of a marine mammal decrease with warmer ocean temperatures
Source: eLife. 2018 Nov 6;7:e38432. doi: 10.7554/eLife.38432 (PMC6245726; doi:10.7554/eLife.38432)
Supplement: Supplementary file 13. [file elife-38432-supp13.xlsx]

## Sheet: Sheet1
Data set name	Data description	Years collected	sample size	Methods used for collection	Result section (s)	Figures
Figure 1-Source data 1	Predictors of hookworm related mortality in South american fur seal pups	2014, 2015, 2017	145	Direct observation, captures, necropsies	Hookworm disease dynamics and mortality in fur seal pups	1
Figure 2-Source data 1	Maternal attendance and health related parameters in pups with different hookworm infection status	2017	78	Direct observation, captures, laboratory analyses	Hookworm clearance is immune-mediated, Maternal attendance affects fur seal pup hookworm clearance	2, 4A, 4B
Figure 3-Source data 1	Leukocyte subsets and interleukin 4 immunohistochemical staining in intestine and mesenteric lymph nodes	2014-2017	45	Necropsy, immunohistochemistry	Hookworm clearance is immune-mediated	3
Figure 4-Source data 1	Phytohemagglutinin immune challenge in 8-week-old pups	2017	75	PHA innoculation, immunohistochemistry	Maternal attendance affects fur seal pup hookworm clearance	4 C
Figure 4-Source data 2	Phytohemagglutinin immune challenge in 4-week-old pups	2017	55	PHA innoculation, immunohistochemistry	Maternal attendance affects fur seal pup hookworm clearance	4 D
Figure 5-Source data 1	Maternal attendance and growth rates in 2007 and 2017	2007, 2017	97	Direct observation, captures	In years with high sea surface temperature there is lower maternal attendance, immune response, and increased hookworm induced mortality	5A, 5B
Figure 5-Source data 2	Immune and metabolic parameter in South American fur seal pups between 2012 and 2017	2012-2017	383	Captures, serum chemistry, hematology	In years with high sea surface temperature there is lower maternal attendance, immune response, and increased hookworm induced mortality	5C
Figure 6-Source data 1	Sea surface temperature data for Guafo Island	2004-2008, 2012-2017	10	NASA earth observation (https://neo.sci.gsfc.nasa.gov )	In years with high sea surface temperature there is lower maternal attendance, immune response, and increased hookworm induced mortality	6
Figure 6-Source data 2	Hookworm prevalence, burden and mortality in South American fur seal pups at Guafo Island	2004-2008, 2012-2017	10	Necropsies	In years with high sea surface temperature there is lower maternal attendance, immune response, and increased hookworm induced mortality	6
